# Supplementary material for: Multi-stimuli responsive properties and structure–property studies of tetraphenylethylene functionalized arylimidazole derivatives
Source: Royal Society of Chemistry journal article supplement (doi:10.1039/d1nj04428a), 2021-01-01
Supplement: d1nj04428a1.pdf [file d1nj04428a1.pdf]

**Multi-stimuli responsive property and structure-property study of  
tetraphenylethylene functionalized arylimidazole derivatives**

Shengmei Guo<sup>a</sup>, Gaobin Zhang<sup>\*ab</sup>, Fangjie Chen<sup>b</sup>, Yingyong Ni<sup>a</sup>, Jianyan Huang<sup>a</sup>, Lin  
Kong<sup>a</sup>, Jiaxiang Yang<sup>\*a</sup>

*<sup>a</sup>College of Chemistry and Chemical Engineering, Key Laboratory of Functional  
Inorganic Materials of Anhui Province, Anhui University, Hefei 230601, P. R. China*

*<sup>b</sup> Henan Key Laboratory of Materials on Deep-Earth Engineering, School of  
Materials Science and Engineering, Henan Polytechnic University, Shiji road 2001,  
Jiaozuo 454003, P. R. China.*

*\*Corresponding authors. E-mail address: [jxyang@ahu.edu.cn](mailto:jxyang@ahu.edu.cn)*

## 1. Materials and instruments

All of the chemicals and solvents were obtained from commercial suppliers without further purification.  $^1\text{H}$  and  $^{13}\text{C}$  NMR spectra of tetraphenylethylene derivatives containing arylimidazole unit were acquired with a Bruker Avance 400 NMR spectrometer using  $\text{CDCl}_3$  as solvent. Mass spectrometry (MS) analyses were investigated on LTQ Orbitrap spectrometer. FT-IR spectra were collected from using the KBr pellet method on a Nicolet 380. The UV-vis absorption spectra were carried out with a TU-1901 spectrophotometer (Japan). PL measurements at room temperature were obtained on a Hitachi FL-7000 spectrometer from Hitachi High Technologies Corporation (Tokyo, Japan). Dynamic Light Scattering (DLS) measurements were recorded on a Malvern Zetasizer Nano ZS90 size analyzer. The time-resolved PL decay spectra and absolute FL quantum yields of the samples were also performed on a HORIBAFluoroMax-4P fluorescence spectrometer at room temperature (R. T.). Quantum yield ( $\Phi_{\text{PL}}$ ) was measured by calibrated integrating sphere. The digital photographs were captured by a Nikon D7000 camera. Powder X-ray diffraction (PXRD) experiments were examined using a MXP18AHF diffractometer (Japan). Scanning electron microscope (SEM) images were taken on a scanning electron microscope (Jeol JSM-4800, Japan). Thermogravimetry (TG) was performed using TGA5500 and differential scanning calorimetry (DSC) was measured at a heating rate of  $10\text{ }^\circ\text{C}/\text{min}$  under  $\text{N}_2$  atmosphere using DSC apparatus (MET-TLER82le/40).

## 2. Synthesis of compound G4, G3, G2.

Compound **G4**: Benzil (1.00 g, 4.76 mmol) and pyridine-4-carboxaldehyde (943 mg, 7.14 mmol) were dissolved in anhydrous acetic acid (30 mL) at room temperature. 2-(4-aminophenyl) acetonitrile (662 mg, 5.71 mmol) was dissolved in glacial acetic acid (5 mL) and was gradually added into this mixture solution. The mixture was stirred for 2 h at  $25\text{ }^\circ\text{C}$ . Then, ammonium acetate (1.83 g, 23.78 mmol) was added and the mixture was heated to  $120\text{ }^\circ\text{C}$  for 12 h. The coarse product was poured into brine

(200 mL) and was neutralized with NaOH aqueous solution. The coarse product (477 mg, 1.16 mmol) and 4-(1,2,2-triphenylvinyl)benzaldehyde were uniformly dispersed in ethanol (20 mL) at 80 °C. Soon afterwards, t-BuOK (195 mg, 1.73 mmol) was added. The reaction mixture was refluxed for 5 h. The final mixture was poured into brine (200 mL). The generated green precipitate was filtered and further purified by column chromatography (petroleum ether: dichloromethane (1 : 1, v/v) to afford compound **G4** (620 mg, 821  $\mu$ mol). Yield: 70%. FT-IR ( $\text{cm}^{-1}$ , KBr)  $\nu$ : 3050, 3029, 2923, 2851, 2218, 1597, 1518, 1419, 1025, 858, 823, 748, 700, 577, 545, 503.  $^1\text{H}$  NMR ( $\text{CDCl}_3$ , 400 MHz)  $\delta$  (ppm): 8.52-8.50 (m, 2H), 7.65 (d,  $J = 8.4$  Hz, 2H), 7.60-7.57 (m, 4H), 7.42 (s, 1H), 7.32 (d,  $J = 6.2$  Hz, 2H), 7.31-7.27 (m, 4H), 7.25-7.21 (m, 1H), 7.15-7.09 (m, 16H), 7.06-7.01 (m, 6H).  $^{13}\text{C}$  NMR ( $\text{CDCl}_3$ , 100 MHz)  $\delta$  (ppm): 149.92, 147.21, 143.24, 143.08, 142.68, 139.90, 139.46, 137.58, 136.99, 135.23, 133.76, 132.27, 132.04, 131.35, 131.28, 131.14, 131.04, 129.77, 128.96, 128.83, 128.70, 128.62, 128.33, 127.92, 127.72, 127.34, 127.12, 126.98, 126.81, 126.79, 122.44, 117.72, 108.99. APCI-MS:  $m/z$   $[\text{M}+\text{H}]^+$  calcd for  $\text{C}_{55}\text{H}_{39}\text{N}_4$ : 755.3175, found = 755.3188.

Compound **G3**: replace pyridine-4-carboxaldehyde with pyridine-3-carboxaldehyde. Yield: 68%. FT-IR ( $\text{cm}^{-1}$ , KBr)  $\nu$ : 3056, 3024, 2927, 2853, 2218, 1602, 1513, 1445, 1074, 1026, 851, 750, 699, 616, 571.  $^1\text{H}$  HMR ( $\text{CDCl}_3$ , 400 MHz)  $\delta$  (ppm): 8.62 (s, 1H), 8.52 (d,  $J = 4.84$ , 1H), 7.82 (d,  $J = 8.00$ , 1H), 7.63-7.53 (m, 6H), 7.38 (s, 1H), 7.29-7.21 (m, 7H), 7.16-7.09 (m, 15H), 7.06-7.01 (m, 6H).  $^{13}\text{C}$  NMR ( $\text{CDCl}_3$ , 100 MHz)  $\delta$  (ppm): 149.52, 149.26, 147.08, 144.01, 143.25, 143.15, 143.07, 142.60, 139.91, 139.16, 136.98, 136.08, 135.00, 133.91, 132.00, 131.43, 131.35, 131.31, 131.26, 131.16, 131.04, 129.98, 128.91, 128.84, 128.65, 128.47, 128.29, 127.99, 127.70, 127.33, 126.99, 126.95, 126.78, 126.73, 126.60, 123.15, 117.70, 109.04. APCI-MS:  $m/z$   $[\text{M}+\text{H}]^+$  calcd for  $\text{C}_{55}\text{H}_{39}\text{N}_4^+$ : 755.3175, found: 755.3163.

Compound **G2**: replace pyridine-4-carboxaldehyde with pyridine-2-carboxaldehyde. Yield: 78%. FT-IR ( $\text{cm}^{-1}$ , KBr)  $\nu$ : 3056, 3024, 2927, 2853, 2218, 1602, 1513, 1445, 1074, 1026, 851, 750, 697, 642, 616, 574.  $^1\text{H}$  HMR ( $\text{CDCl}_3$ , 400 MHz)  $\delta$  (ppm): 8.29 (d,  $J = 4.84$  Hz, 1H), 8.06 (d,  $J = 7.92$  Hz, 1H), 7.71 (t,  $J = 7.72$

Hz, 1H), 7.61 (t,  $J = 8.44$  Hz, 4H), 7.49 (d,  $J = 8.60$  Hz, 2H), 7.37 (s, 1H), 7.27-7.22 (m, 6H), 7.16-7.10 (m, 16H), 7.06-7.02 (m, 6H).  $^{13}\text{C}$  NMR ( $\text{CDCl}_3$ , 100 MHz)  $\delta$  (ppm): 149.59, 148.67, 146.79, 145.55, 143.28, 143.12, 142.50, 142.37, 139.96, 138.73, 128.41, 136.38, 134.18, 133.89, 131.96, 131.40, 131.35, 131.32, 131.28, 131.15, 130.25, 128.94, 128.82, 128.54, 128.31, 128.19, 127.90, 127.71, 127.39, 126.93, 126.81, 126.76, 125.84, 123.84, 122.77, 117.92, 109.61. APCI-MS:  $m/z$   $[\text{M}+\text{H}]^+$  calcd for  $\text{C}_{55}\text{H}_{39}\text{N}_4$ : 755.3175, found: 755.3170.

### 3. Synthesis of compound L-G4, L-G3, L-G2.

Compound **L-G4**: phenanthraquinone (1.00 g, 4.76 mmol) and pyridine-4-carboxaldehyde (943 mg, 7.14 mmol) were dissolved in anhydrous acetic acid (30 mL) at room temperature. 2-(4-aminophenyl) acetonitrile (662 mg, 5.71 mmol) was dissolved in glacial acetic acid (5 mL) and was gradually added into this mixture solution. The mixture was stirred for 2 h at 25 °C. Then, ammonium acetate (1.83 g, 23.78 mmol) was added and the mixture was heated to 120 °C for 12 h. The coarse product was poured into brine (200 mL) and was neutralized with NaOH aqueous solution. To a flask containing coarse product (477 mg, 1.16 mmol) was added 4-(1,2,2-triphenylvinyl)benzaldehyde (500 mg, 1.39 mmol), t-BuOK (195 mg, 1.73 mmol) and EtOH (20 mL) at 80 °C. The reaction mixture was refluxed for 5 h. The final mixture was poured into brine (200 mL). The generated green precipitate was filtered and further purified by column chromatography (petroleum ether: dichloromethane (1 : 1, v/v) to afford compound **L-G4** (590 mg, 782  $\mu\text{mol}$ ). Yield: 68%. FT-IR ( $\text{cm}^{-1}$ , KBr)  $\nu$ : 3057, 3027, 2923, 2853, 2231, 2216, 1596, 1508, 1491, 1454, 1418, 1385, 1071, 1031, 994, 899, 856, 825, 757, 747, 725, 701, 673, 642, 614, 572.  $^1\text{H}$  NMR ( $\text{CDCl}_3$ , 400 MHz)  $\delta$  (ppm): 8.84 (d,  $J = 8.00$  Hz, 1H), 8.77 (d,  $J = 7.84$  Hz, 1H), 8.69 (d,  $J = 8.04$  Hz, 1H), 8.56-8.54 (m, 2H), 7.93-7.91 (m, 2H), 7.77-7.73 (m, 3H), 7.70-7.65 (m, 1H), 7.62-7.59 (m, 3H), 7.57-7.53 (m, 1H), 7.46-7.45 (m, 2H), 7.33-7.29 (m, 1H), 7.22-7.10 (m, 13H), 7.08-7.02 (m, 5H).  $^{13}\text{C}$  NMR ( $\text{CDCl}_3$ , 100 MHz)  $\delta$  (ppm): 150.09, 147.70, 147.54, 143.97, 143.32, 143.15, 142.86, 139.97, 138.66, 138.01, 137.83, 136.81, 132.21, 131.45, 131.37, 131.18, 129.87, 129.64, 129.21, 128.92, 128.59, 128.03, 127.83, 127.69, 127.10, 127.04, 126.93, 126.28,

125.75, 124.43, 123.30, 122.97, 122.86, 122.71, 120.94, 117.87, 108.97. APCI-MS:  $m/z$   $[M+H]^+$  calcd for  $C_{55}H_{39}N_4$ : 753.3018, found = 753.3075.

Compound **L-G3**: replace pyridine-4-carboxaldehyde with pyridine-3-carboxaldehyde. Yield: 69%. FT-IR ( $cm^{-1}$ , KBr)  $\nu$ : 3051, 3027, 2919, 2854, 2216, 1598, 1576, 1514, 1489, 1453, 1419, 1381, 1147, 1075, 1023, 852, 752, 726, 699, 616, 571, 545.  $^1H$  NMR ( $CDCl_3$ , 400 MHz)  $\delta$  (ppm): 8.84 (d,  $J = 8.0$  Hz, 1H), 8.79-8.75 (m, 2H), 8.71 (d,  $J = 8.3$  Hz, 1H), 8.55 (d,  $J = 4.9$  Hz, 1H), 7.94-7.92 (m, 1H), 7.87 (d,  $J = 8.5$  Hz, 2H), 7.77-7.65 (m, 4H), 7.59-7.53 (m, 4H), 7.33-7.21 (m, 3H), 7.17-7.02 (m, 17H).  $^{13}C$  NMR ( $CDCl_3$ , 100 MHz)  $\delta$  (ppm): 149.91, 149.84, 148.06, 147.45, 143.94, 143.33, 143.16, 142.81, 140.00, 138.62, 137.95, 136.72, 136.64, 132.19, 131.46, 131.38, 131.22, 129.73, 129.64, 129.17, 128.51, 128.04, 127.81, 127.78, 127.62, 127.09, 126.91, 126.80, 126.67, 126.12, 125.51, 124.39, 123.31, 122.81, 122.76, 120.88, 117.86, 109.03. APCI-MS:  $m/z$   $[M+H]^+$  calcd for  $C_{55}H_{37}N_4$ : 753.3018, found = 753.3091.

Compound **L-G2**: replace pyridine-4-carboxaldehyde with pyridine-2-carboxaldehyde. Yield: 62%. FT-IR ( $cm^{-1}$ , KBr)  $\nu$ : 3051, 3024, 2922, 2852, 2214, 1584, 1513, 1493, 1454, 1438, 1424, 1385, 1280, 1152, 1075, 1030, 996, 851, 790, 735, 725, 614, 576, 548.  $^1H$  NMR ( $CDCl_3$ , 400 MHz)  $\delta$  (ppm): 8.87 (d,  $J = 8.4$  Hz, 1H), 8.77 (d,  $J = 7.76$  Hz, 1H), 8.70 (d,  $J = 8.20$  Hz, 1H), 8.34-8.32 (m, 1H), 8.19 (d,  $J = 7.92$  Hz, 1H), 7.82 (d,  $J = 8.6$  Hz, 2H), 7.77-7.71 (m, 4H), 7.68-7.67 (m, 1H), 7.61-7.58 (m, 3H), 7.55-7.51 (m, 1H), 7.31-7.27 (m, 1H), 7.21-7.02 (m, 19H).  $^{13}C$  NMR ( $CDCl_3$ , 100 MHz)  $\delta$  (ppm): 149.52, 149.26, 147.08, 144.01, 143.25, 143.15, 143.07, 142.60, 139.91, 139.16, 136.98, 136.08, 135.00, 133.91, 132.00, 131.43, 131.35, 131.31, 131.26, 131.16, 131.04, 129.98, 128.91, 128.84, 128.65, 128.47, 128.29, 127.99, 127.70, 127.33, 126.99, 126.95, 126.78, 126.73, 126.60, 123.15, 117.70, 109.04. APCI-MS:  $m/z$   $[M+H]^+$  calcd for  $C_{55}H_{37}N_4$ : 753.3018, found = 753.3009.

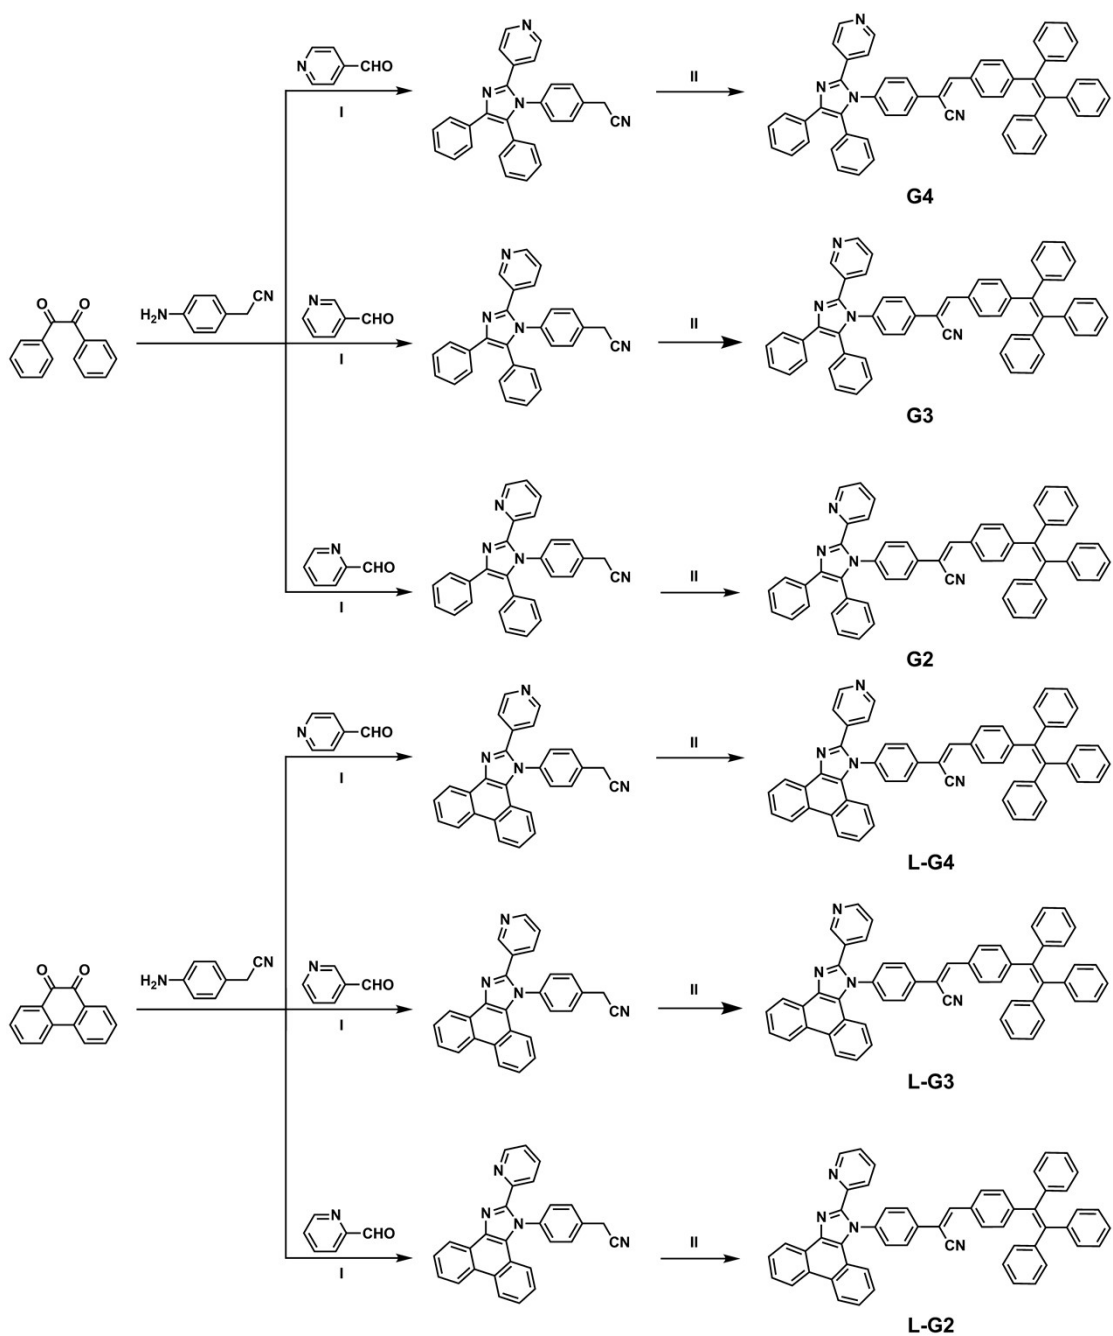

Scheme S1. Synthetic route of compounds **G4**, **G3**, **G2**, **L-G4**, **L-G3**, **L-G2**. (I) acetic acid and ammonium acetate, 12 h, 120 °C; (II) 4-(1,2,2-triphenylvinyl)benzaldehyde, *t*-BuOK and ethanol, 5 h, 80 °C.

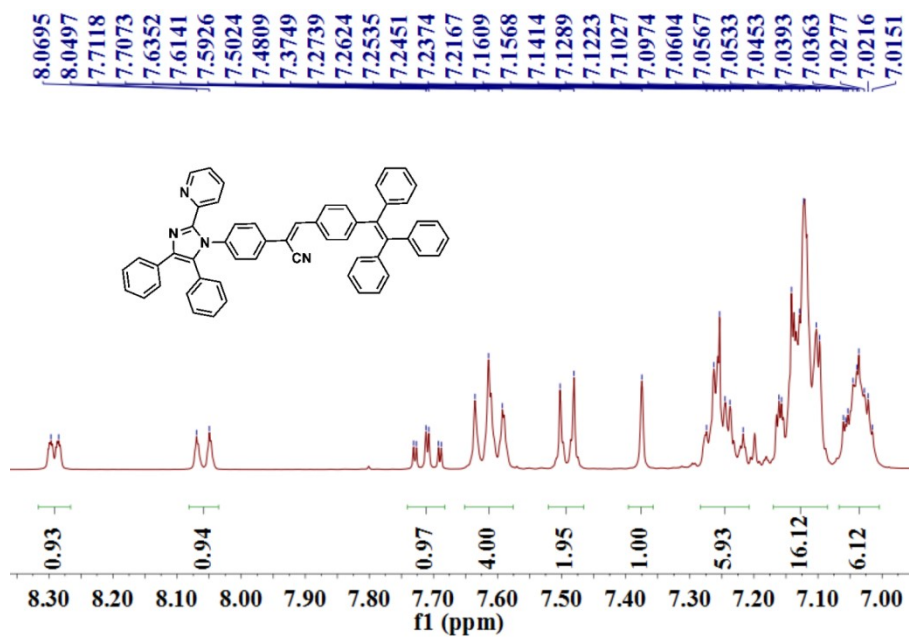

Fig. S1 The  $^1\text{H}$  NMR spectrum of compound G2.

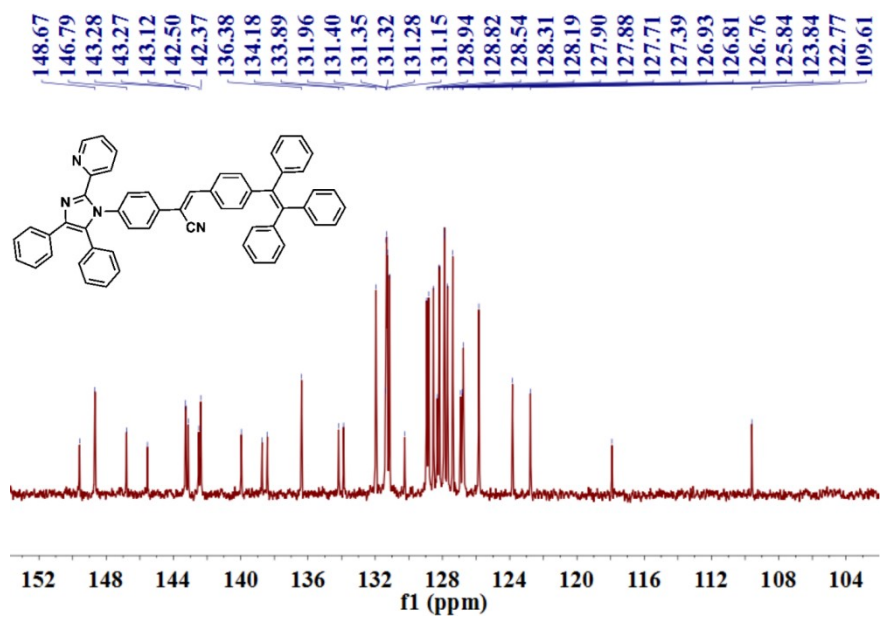

Fig. S2 The  $^{13}\text{C}$  NMR spectrum of compound G2.

G2 #22 RT: 0.17 AV: 1 SB: 1 0.07 NL: 4.93E7  
T: FTMS + c APCI corona Full ms [100.00-1200.00]

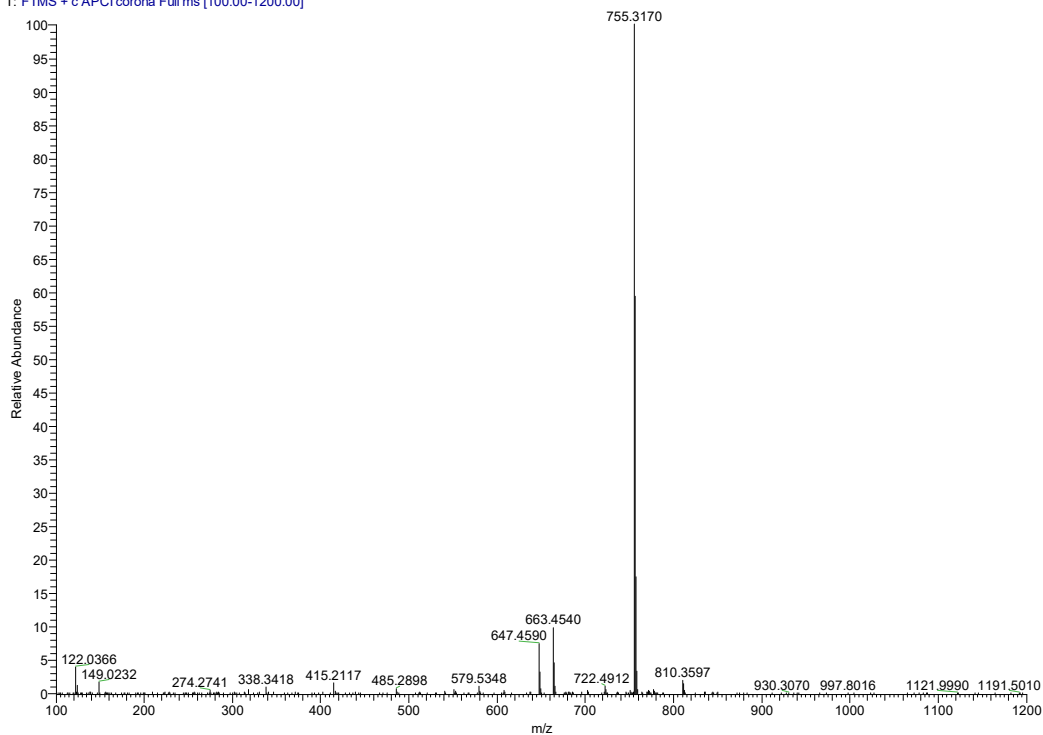

Fig. S3 The MS spectrum of compound G2.

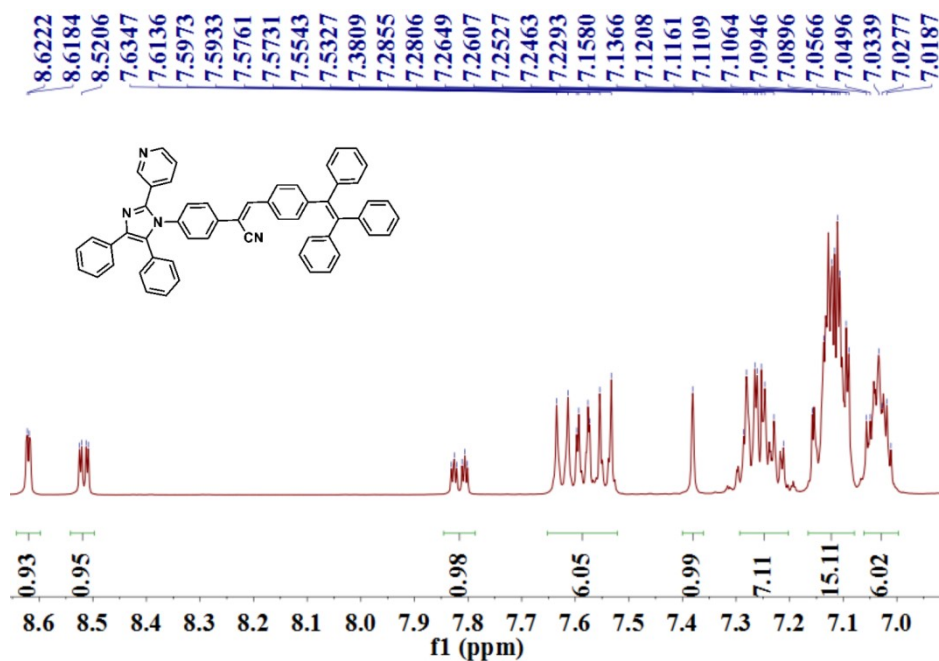

Fig. S4 The <sup>1</sup>H NMR spectrum of compound G3.



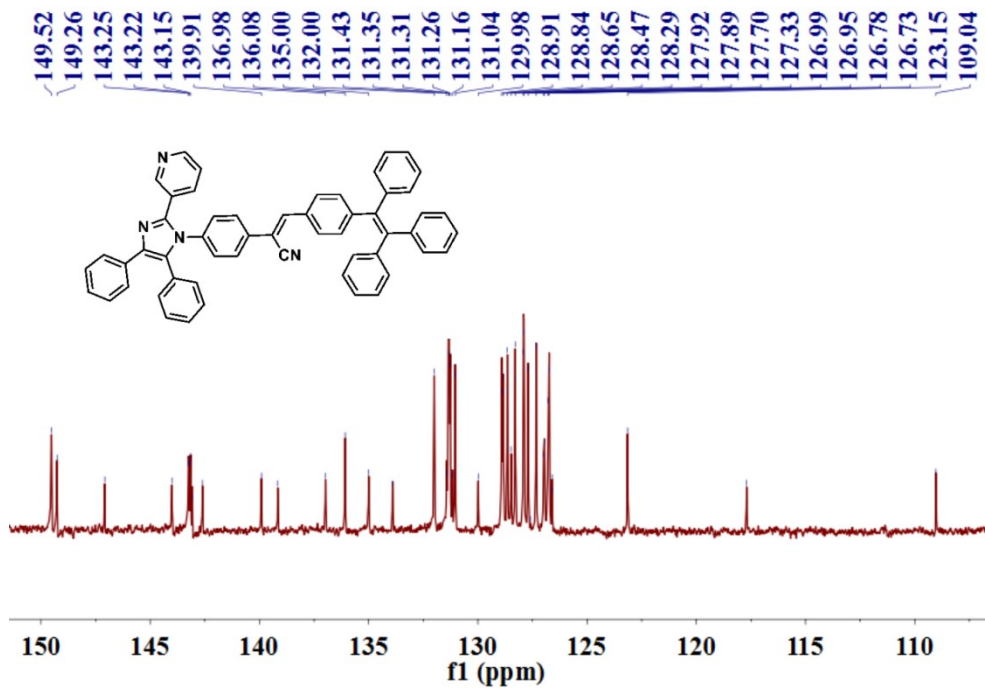

Fig. S5 The  $^{13}\text{C}$  NMR spectrum of compound G3.

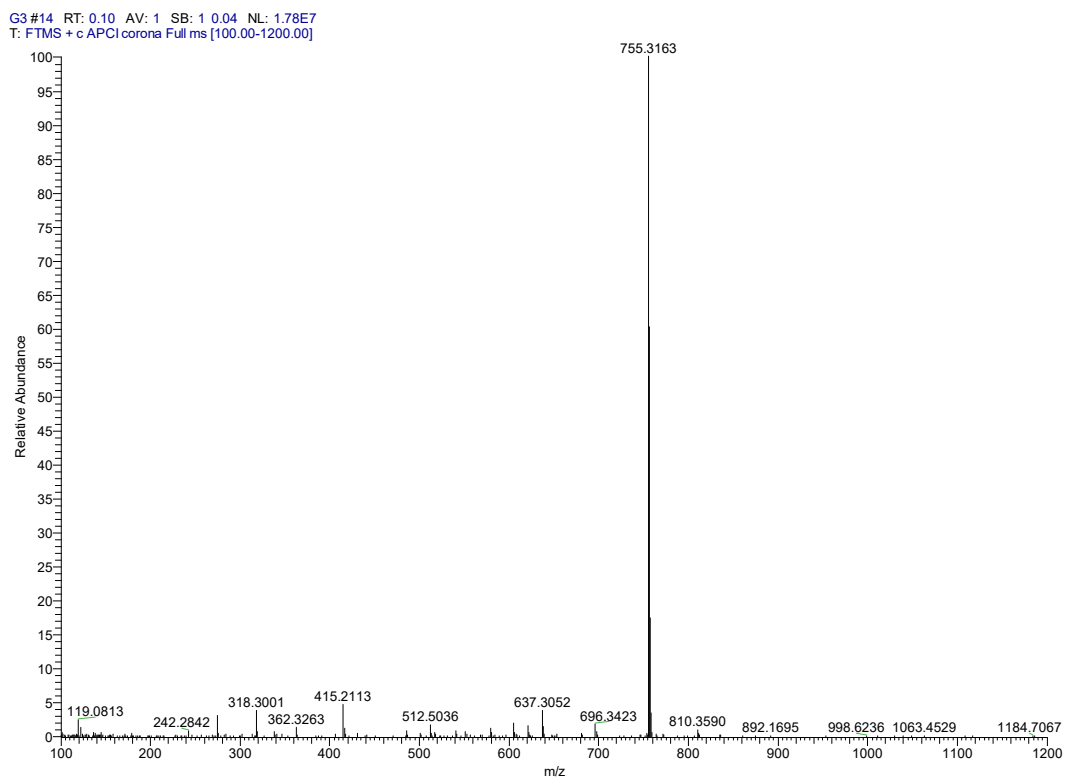

Fig. S6 The MS spectrum of compound G3.

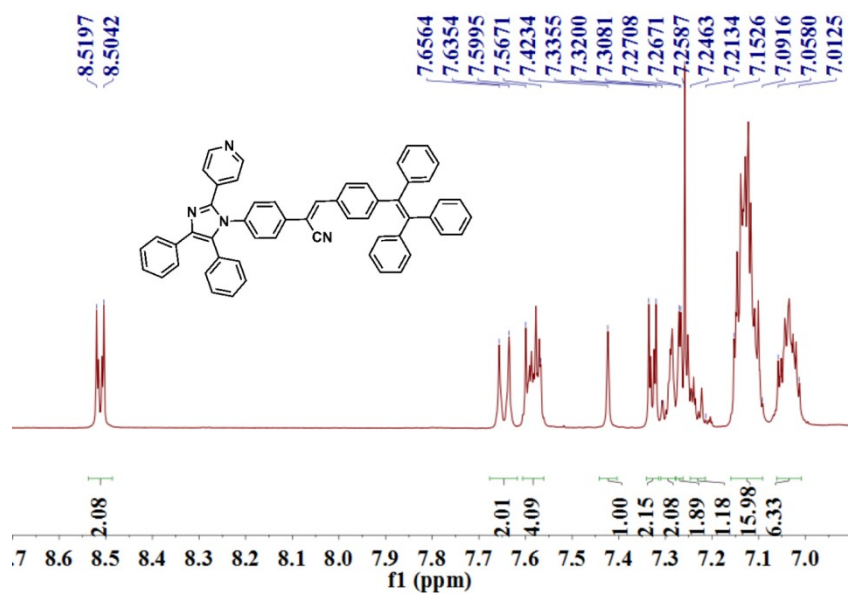

**Fig. S7** The  $^1\text{H}$  NMR spectrum of compound G4.

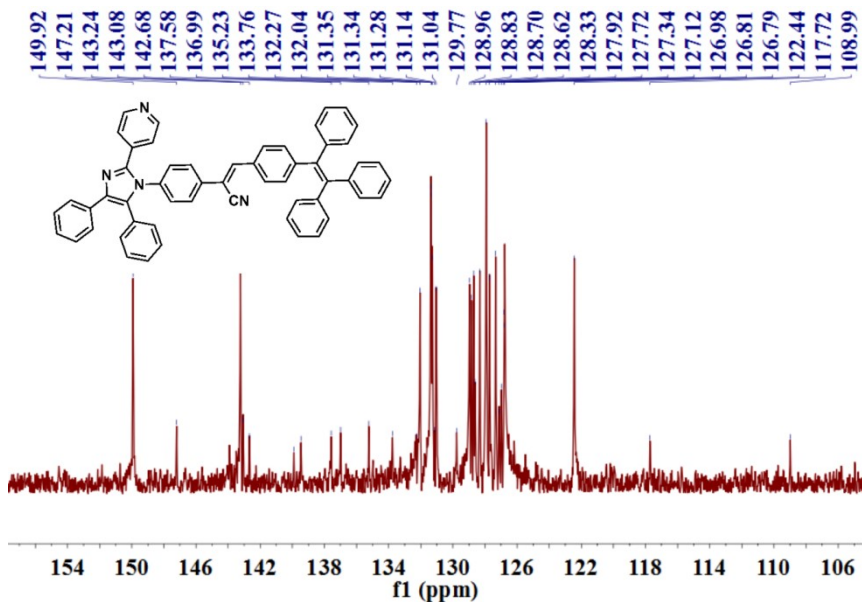

**Fig. S8** The  $^{13}\text{C}$  NMR spectrum of compound G4.

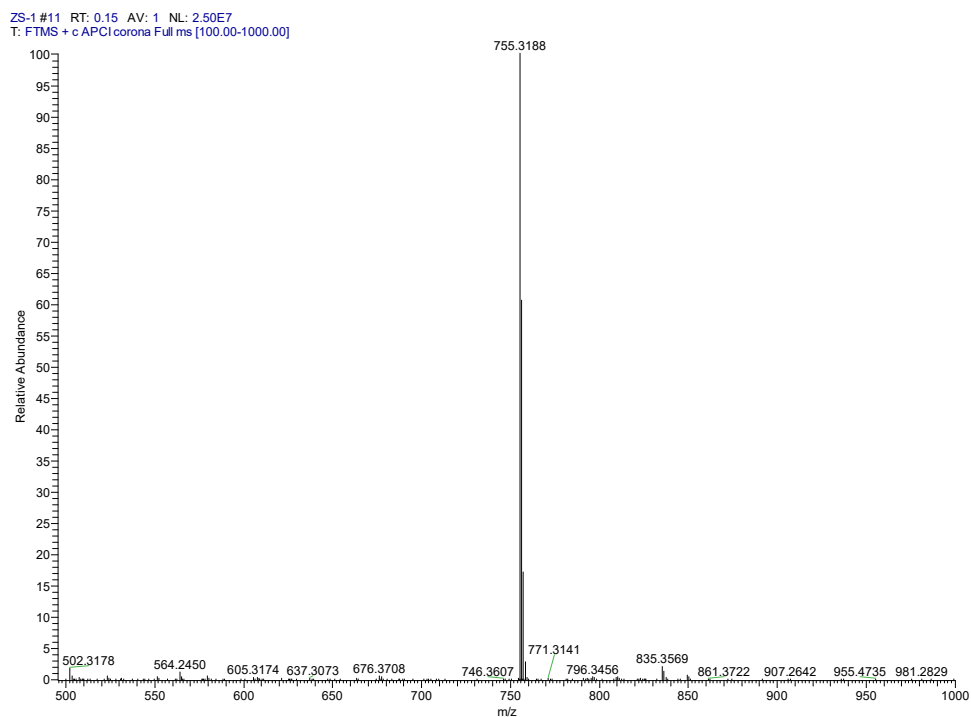

**Fig. S9** The MS spectrum of compound G4.

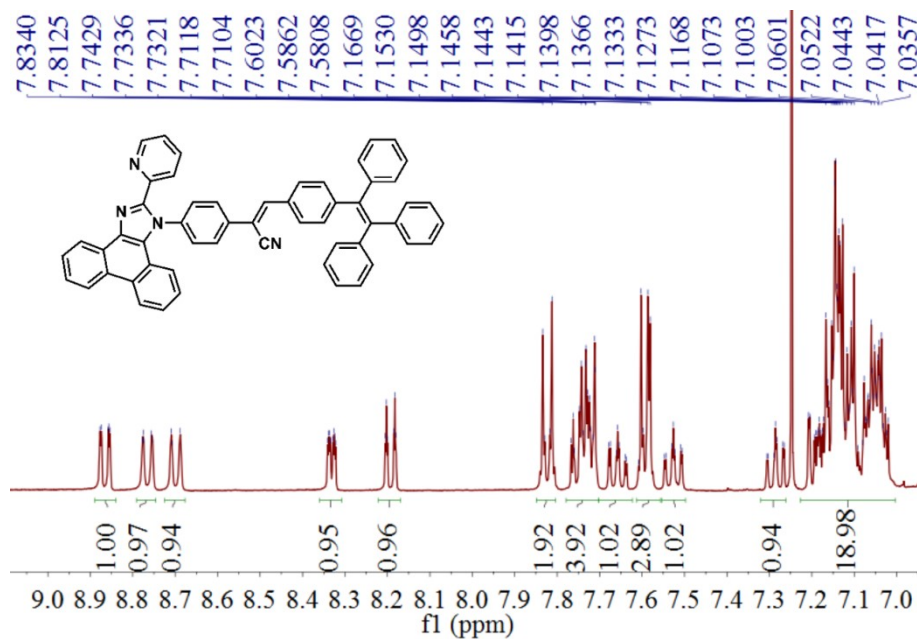

**Fig. S10** The  $^1\text{H}$  NMR spectrum of compound L-G2.

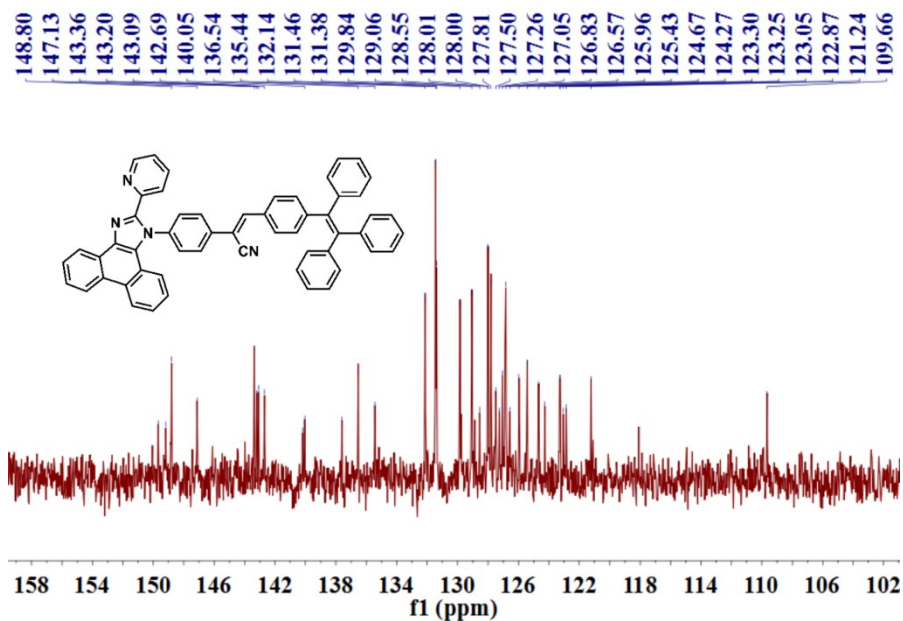

**Fig. S11** The  $^{13}\text{C}$  NMR spectrum of compound G4.

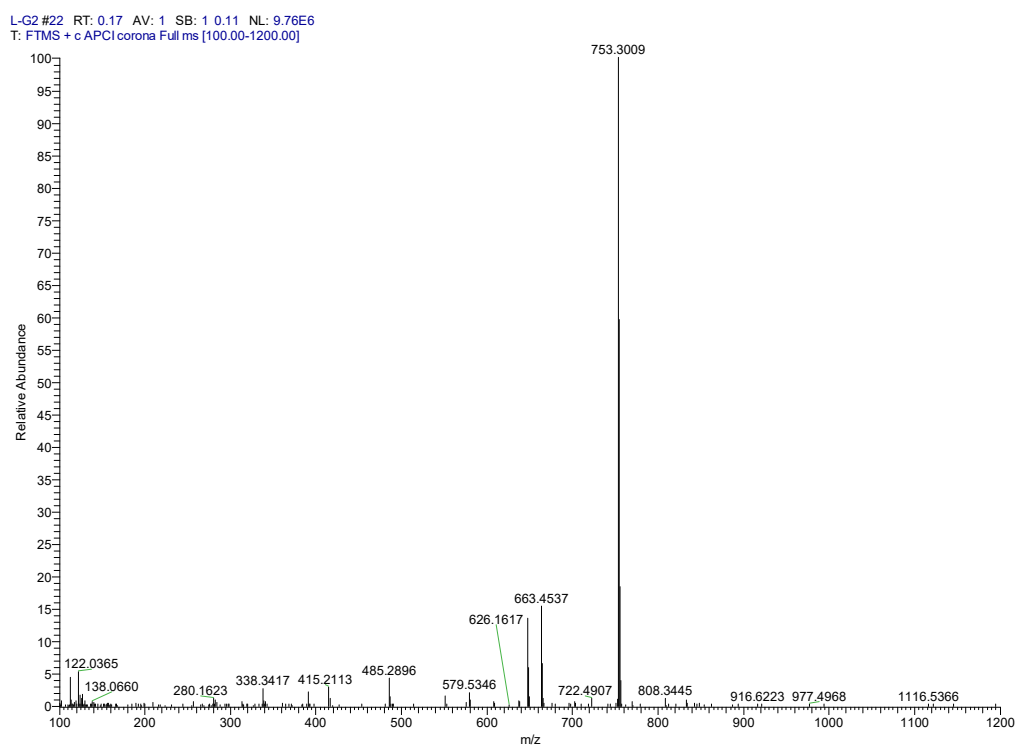

**Fig. S12** The MS spectrum of compound L-G2.

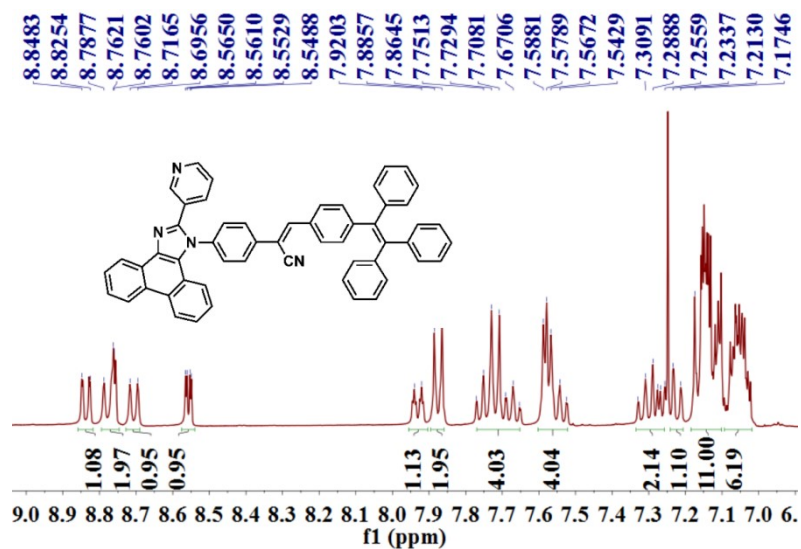

Fig. S13 The  $^1\text{H}$  NMR spectrum of compound L-G3.

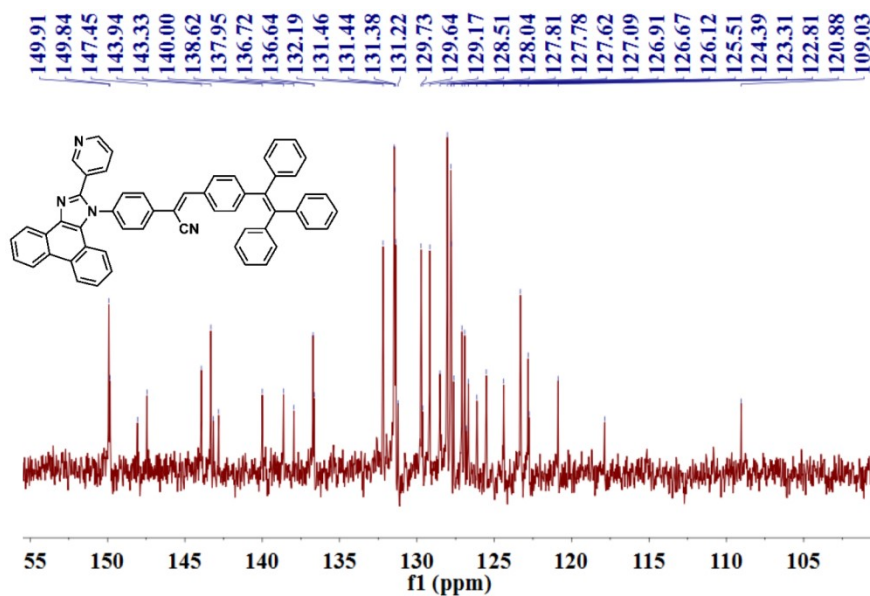

Fig. S14 The  $^{13}\text{C}$  NMR spectrum of compound L-G3.

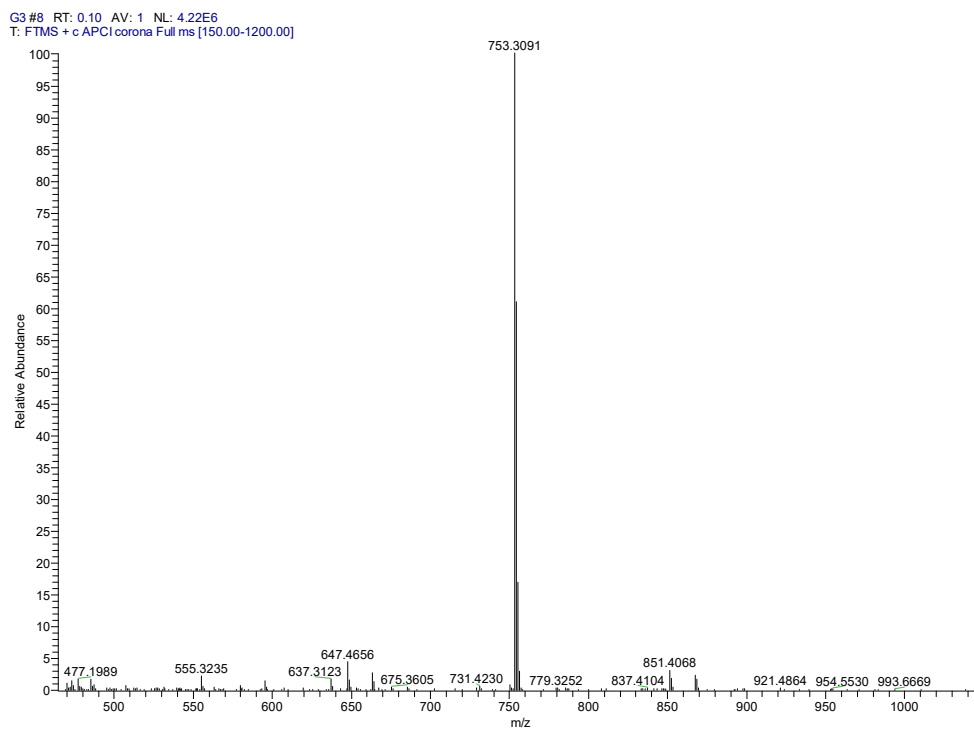

**Fig. S15** The MS spectrum of compound L-G3.

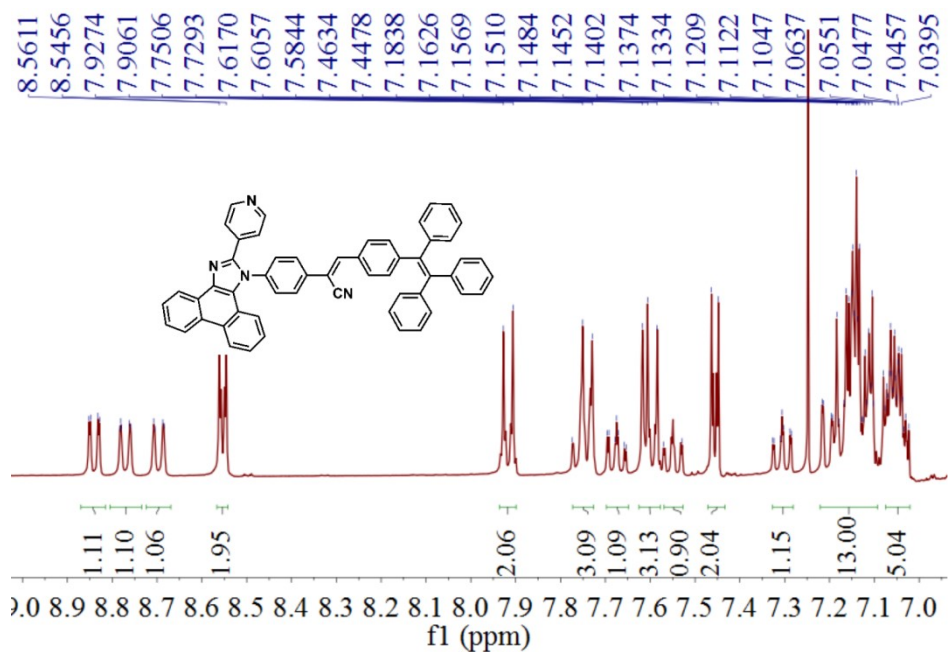

**Fig. S16** The  $^1\text{H}$  NMR spectrum of compound L-G4.

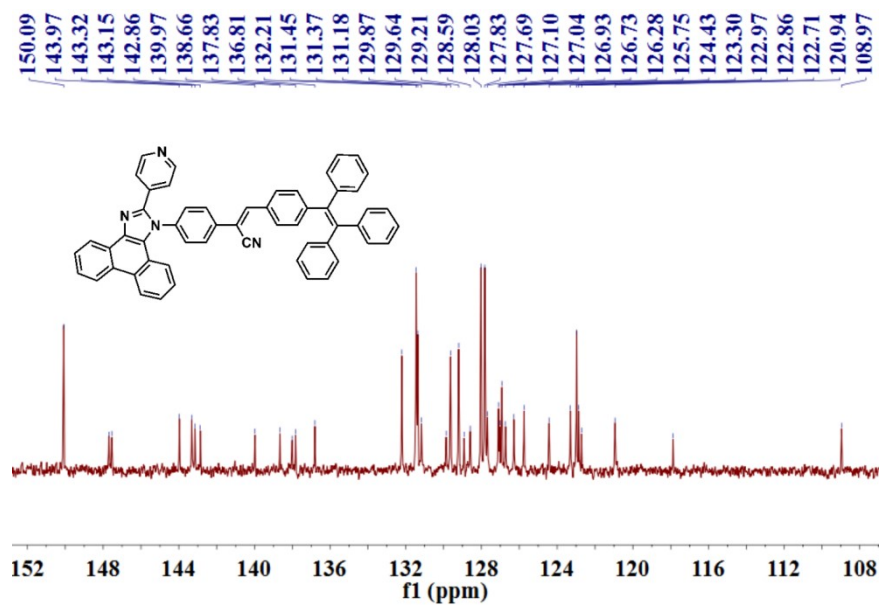

**Fig. S17** The  $^{13}\text{C}$  NMR spectrum of compound L-G4.

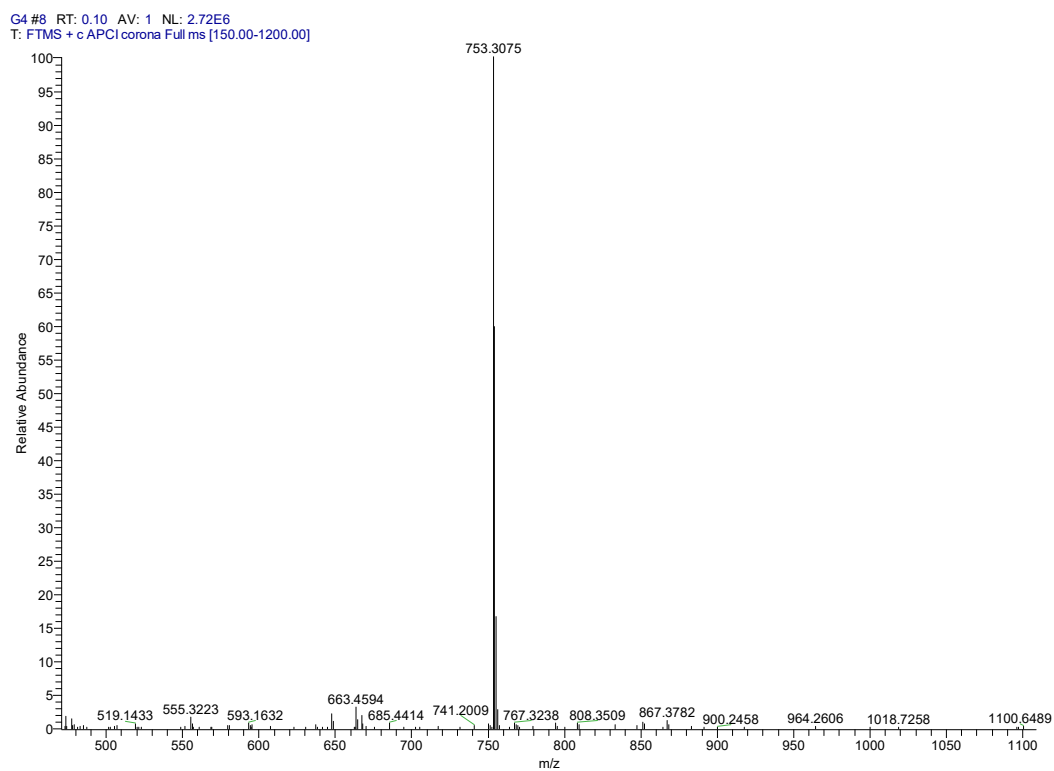

**Fig. S18** The MS spectrum of compound L-G4.

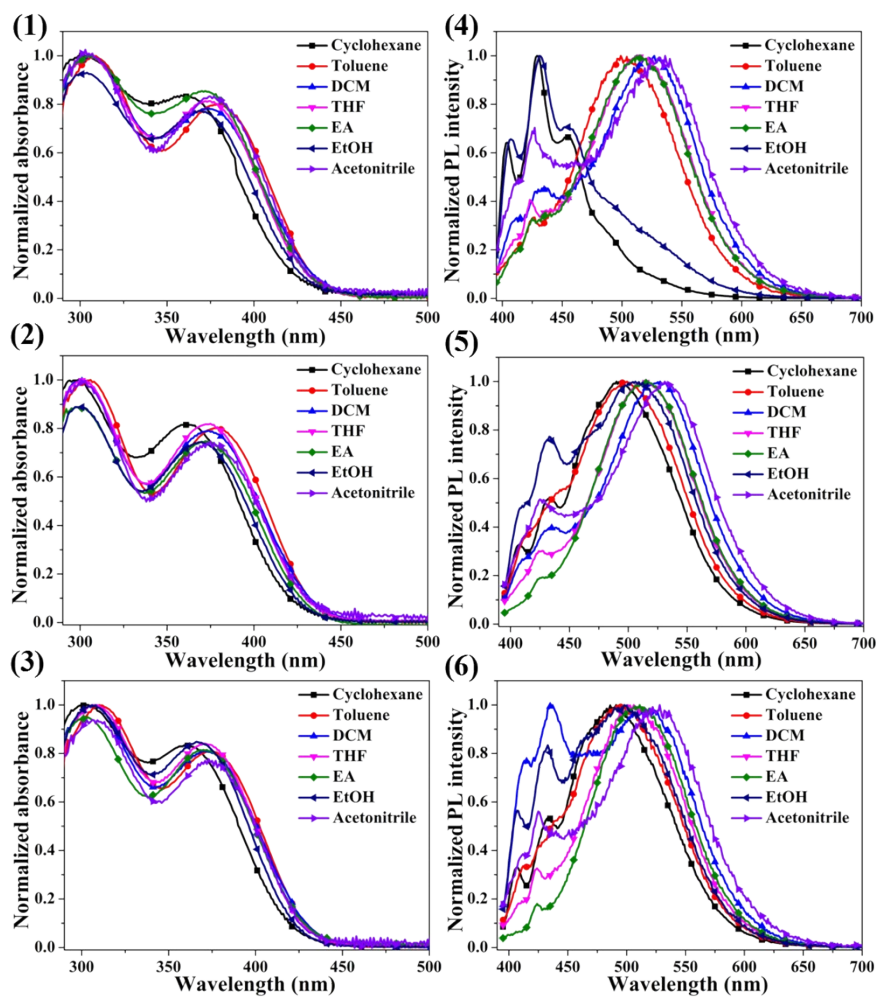

**Fig. S19** The normalized absorption and PL intensity spectra of **G4** (1, 4), **G3**(2, 5), **G2** (3, 6) in the different solvents.



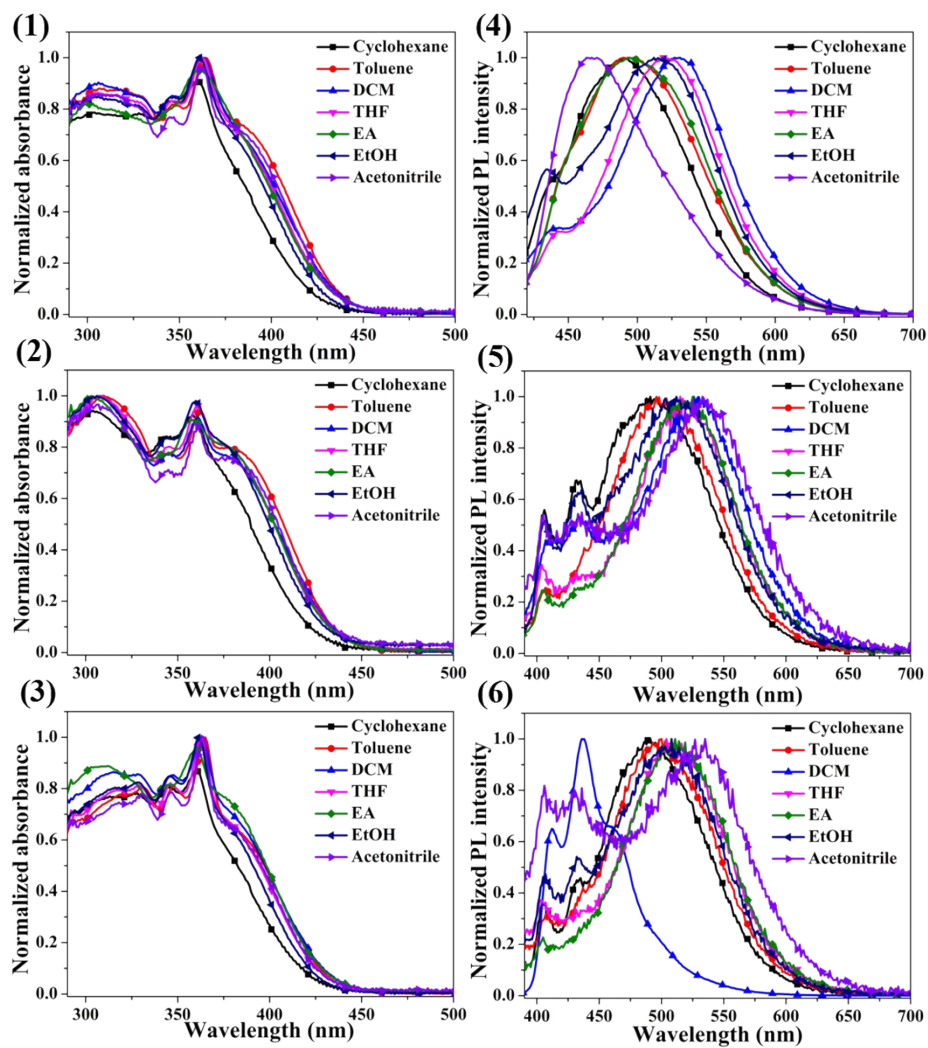

**Fig. S20** The normalized absorption and PL intensity spectra of L-G4 (1, 4), L-G3(2, 5), L-G2 (3, 6) in the different solvents.

**Table S1.** Optical data of the compounds in different solvents and in the solid state

| Compds    | solvents     | $\lambda_{ab}^a$<br>(nm) | $\lambda_{em}^b$<br>(nm) | $\Delta\nu^c$<br>( $\text{cm}^{-1}$ ) | Compds      | solvents     | $\lambda_{ab}^a$<br>(nm) | $\lambda_{em}^b$<br>(nm) | $\Delta\nu^c$<br>( $\text{cm}^{-1}$ ) |
|-----------|--------------|--------------------------|--------------------------|---------------------------------------|-------------|--------------|--------------------------|--------------------------|---------------------------------------|
| <b>G4</b> | Cyclohexane  | 360                      | 429                      | 4468                                  | <b>L-G4</b> | Cyclohexane  | 360                      | 490                      | 7370                                  |
|           | Toluene      | 379                      | 499                      | 6345                                  |             | Toluene      | 364                      | 490                      | 7064                                  |
|           | DCM          | 374                      | 527                      | 7763                                  |             | DCM          | 362                      | 531                      | 8792                                  |
|           | THF          | 374                      | 513                      | 7245                                  |             | THF          | 362                      | 519                      | 8356                                  |
|           | EA           | 372                      | 512                      | 7350                                  |             | EA           | 361                      | 498                      | 7621                                  |
|           | EtOH         | 369                      | 431                      | 3898                                  |             | EtOH         | 361                      | 512                      | 8170                                  |
|           | Acetonitrile | 374                      | 536                      | 8021                                  |             | Acetonitrile | 363                      | 467                      | 6135                                  |
| <b>G3</b> | Cyclohexane  | 360                      | 490                      | 7370                                  | <b>L-G3</b> | Cyclohexane  | 360                      | 491                      | 7411                                  |
|           | Toluene      | 378                      | 499                      | 6415                                  |             | Toluene      | 362                      | 496                      | 7463                                  |
|           | DCM          | 373                      | 527                      | 7834                                  |             | DCM          | 360                      | 533                      | 9016                                  |
|           | THF          | 375                      | 517                      | 7324                                  |             | THF          | 361                      | 515                      | 8283                                  |
|           | EA           | 372                      | 517                      | 7539                                  |             | EA           | 359                      | 525                      | 8808                                  |
|           | EtOH         | 369                      | 508                      | 7415                                  |             | EtOH         | 360                      | 512                      | 8247                                  |
|           | Acetonitrile | 374                      | 531                      | 7906                                  |             | Acetonitrile | 360                      | 533                      | 9016                                  |
| <b>G2</b> | Cyclohexane  | 357                      | 491                      | 7645                                  | <b>L-G2</b> | Cyclohexane  | 360                      | 491                      | 7411                                  |
|           | Toluene      | 374                      | 494                      | 6495                                  |             | Toluene      | 362                      | 500                      | 7624                                  |
|           | DCM          | 372                      | 513                      | 7389                                  |             | DCM          | 360                      | 436                      | 4842                                  |
|           | THF          | 373                      | 506                      | 7047                                  |             | THF          | 361                      | 504                      | 7860                                  |
|           | EA           | 372                      | 511                      | 7312                                  |             | EA           | 359                      | 511                      | 8236                                  |
|           | EtOH         | 368                      | 498                      | 7094                                  |             | EtOH         | 360                      | 508                      | 8093                                  |
|           | Acetonitrile | 373                      | 528                      | 7870                                  |             | Acetonitrile | 361                      | 535                      | 9009                                  |

<sup>a</sup> Peak position of the maximum absorption band. <sup>b</sup> Peak position of fluorescence emission, excited at the absorption maximum. <sup>c</sup> Stokes' shift in  $\text{cm}^{-1}$ . <sup>d,e</sup> absolute fluorescence quantum yields ( $\Phi_{PL}$ ) and wavelength ( $\lambda_{PL}$ ) before and after grinding in the solid state.

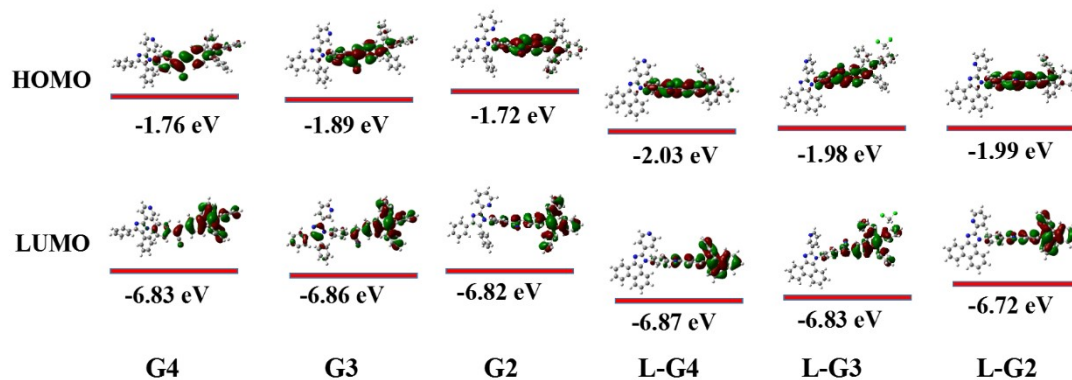

Fig. S21 The HOMO and LUMO electron cloud distribution of the compounds.

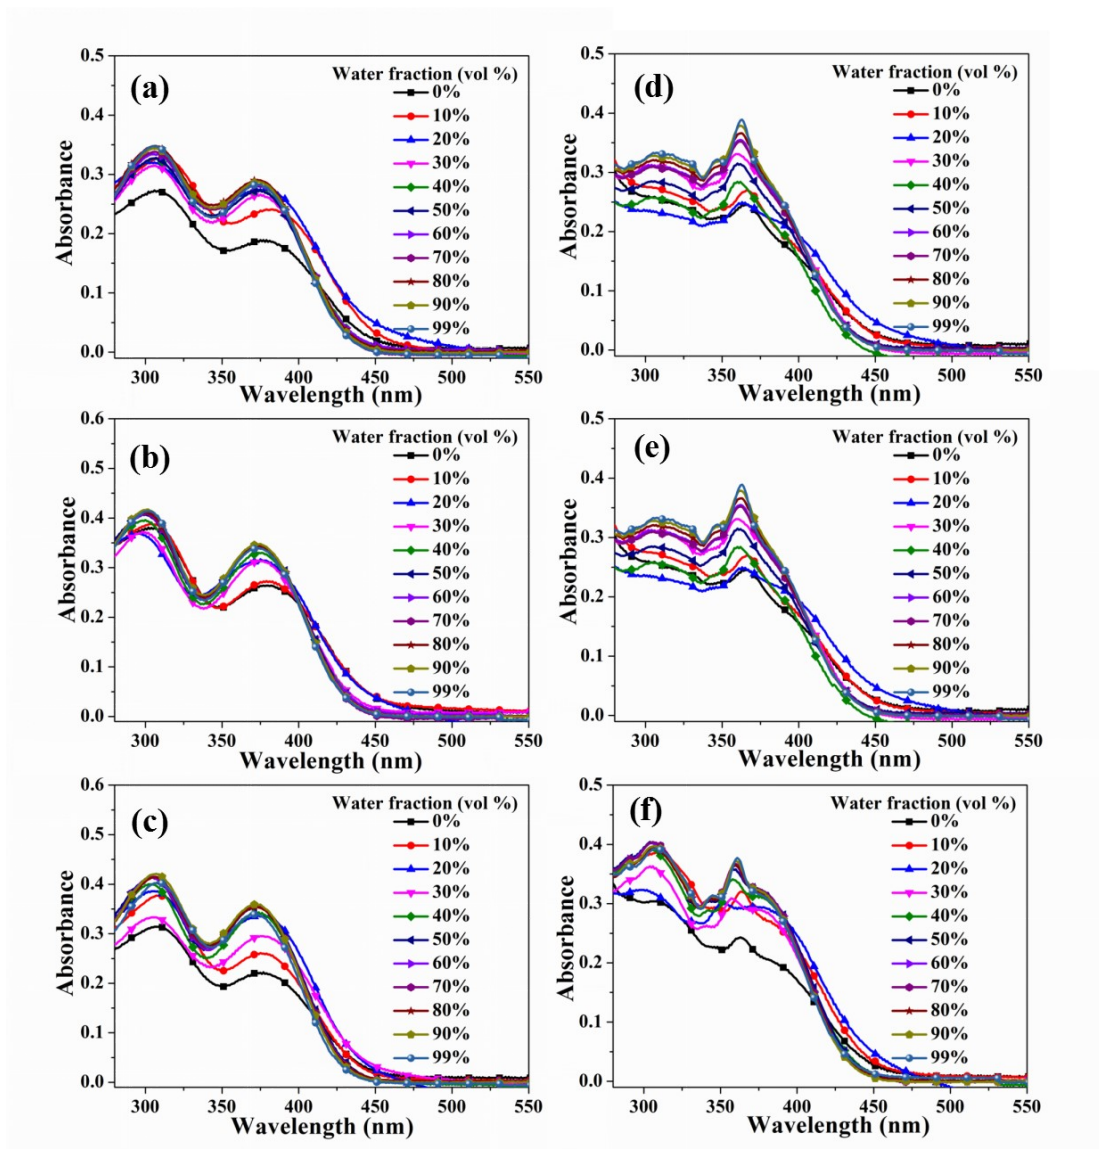

Fig. S22 (a) The UV-vis absorption spectra of compounds G4 (a), G3 (b), G2 (c), L-G4 (d), L-G3 (e), L-G2 (f) in THF/H<sub>2</sub>O mixtures with different water volume fractions.

**Table S2.** Fluorescence quantum yield data of the compounds

| Cpds      | $\Phi$                |                        |         | Cpds        | $\Phi$                |                        |         |
|-----------|-----------------------|------------------------|---------|-------------|-----------------------|------------------------|---------|
|           | (0% H <sub>2</sub> O) | (99% H <sub>2</sub> O) | (solid) |             | (0% H <sub>2</sub> O) | (99% H <sub>2</sub> O) | (solid) |
| <b>G2</b> | 0.45                  | 26.57                  | 67      | <b>L-G2</b> | 0.77                  | 45.57                  | 48      |
| <b>G3</b> | 0.48                  | 29.99                  | 72      | <b>L-G3</b> | 0.27                  | 39.20                  | 52      |
| <b>G4</b> | 0.47                  | 31.85                  | 67      | <b>L-G4</b> | 0.45                  | 35.16                  | 40      |

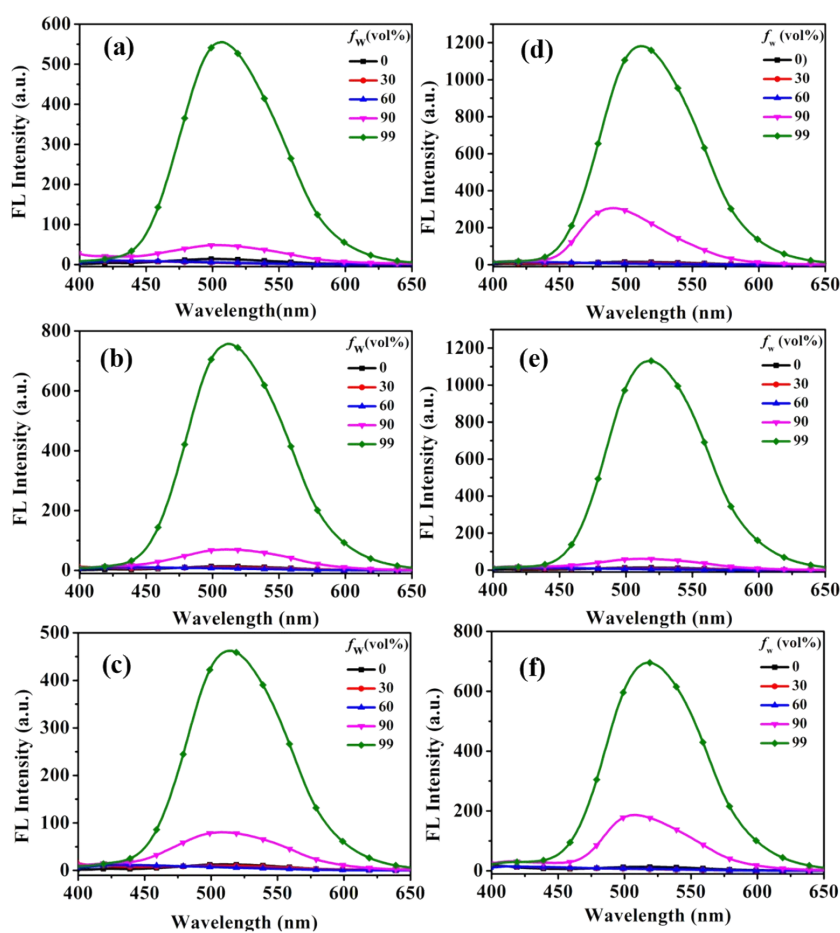

**Fig. S23** (a) The FL spectra of compounds **G2** (a), **G3** (b), **G4** (c), **L-G2** (d), **L-G3** (e), **L-G4** (f) in glycerinum/H<sub>2</sub>O mixtures with different water volume fractions.

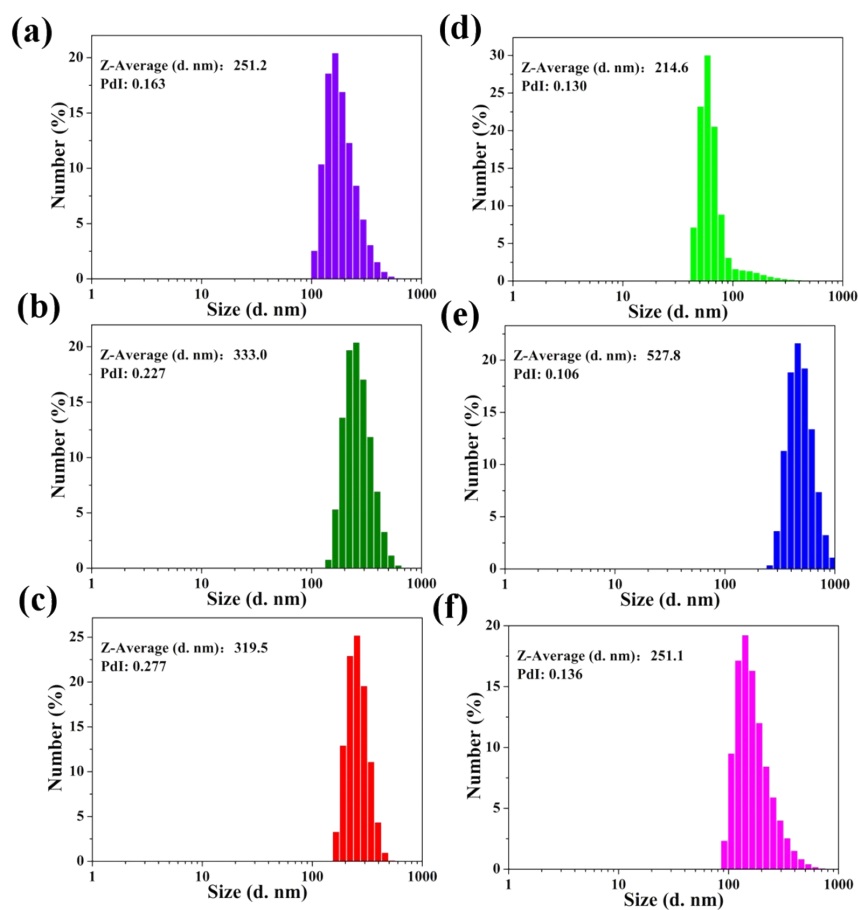

**Fig. S24** DLS size distribution of of the nanoparticles of **G4** (a), **G3** (b), **G2** (c), **L-G4** (d), **L-G3** (e), **L-G2** (f) in THF/H<sub>2</sub>O solution (1 : 9, v/v).

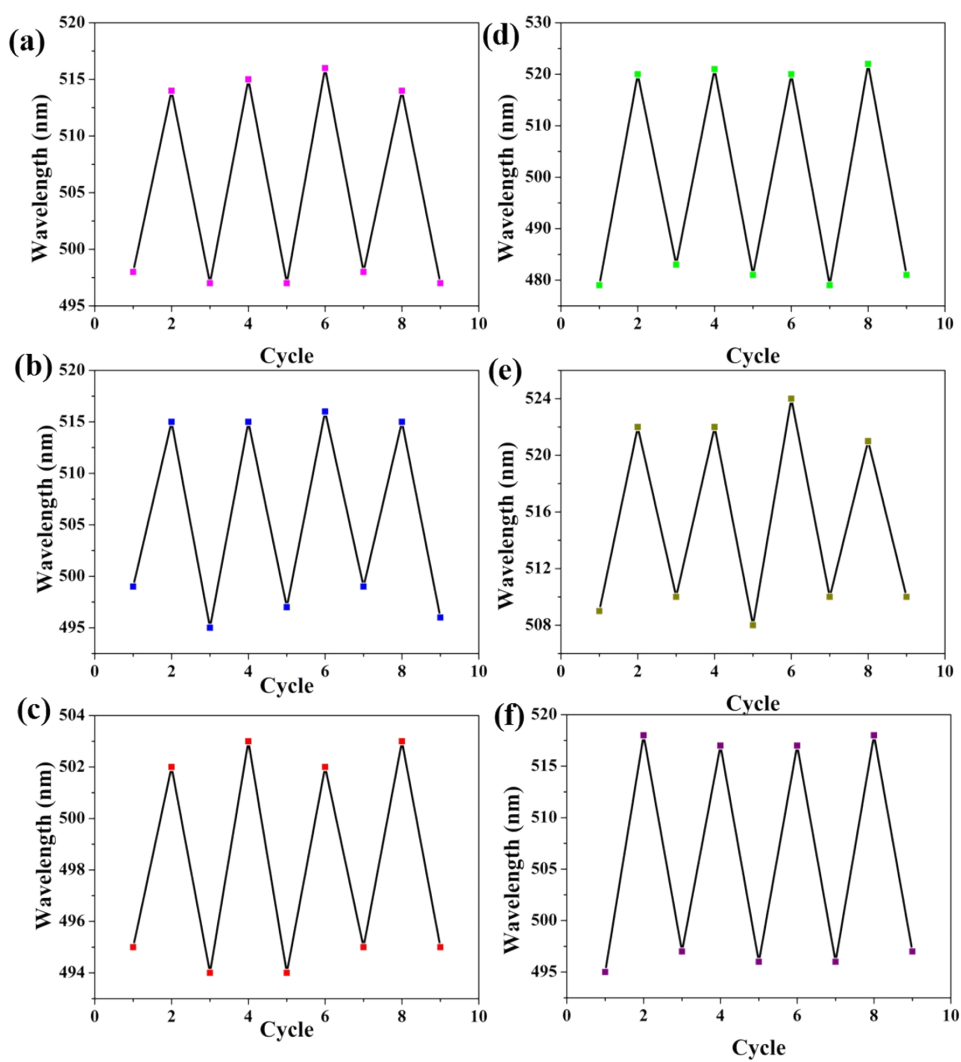

**Fig. S25** Repeated switching of compounds **G4** (a), **G3** (b), **G2** (c), **L-G4** (d), **L-G3** (e), **L-G2** (f) by ground-heated cycles.

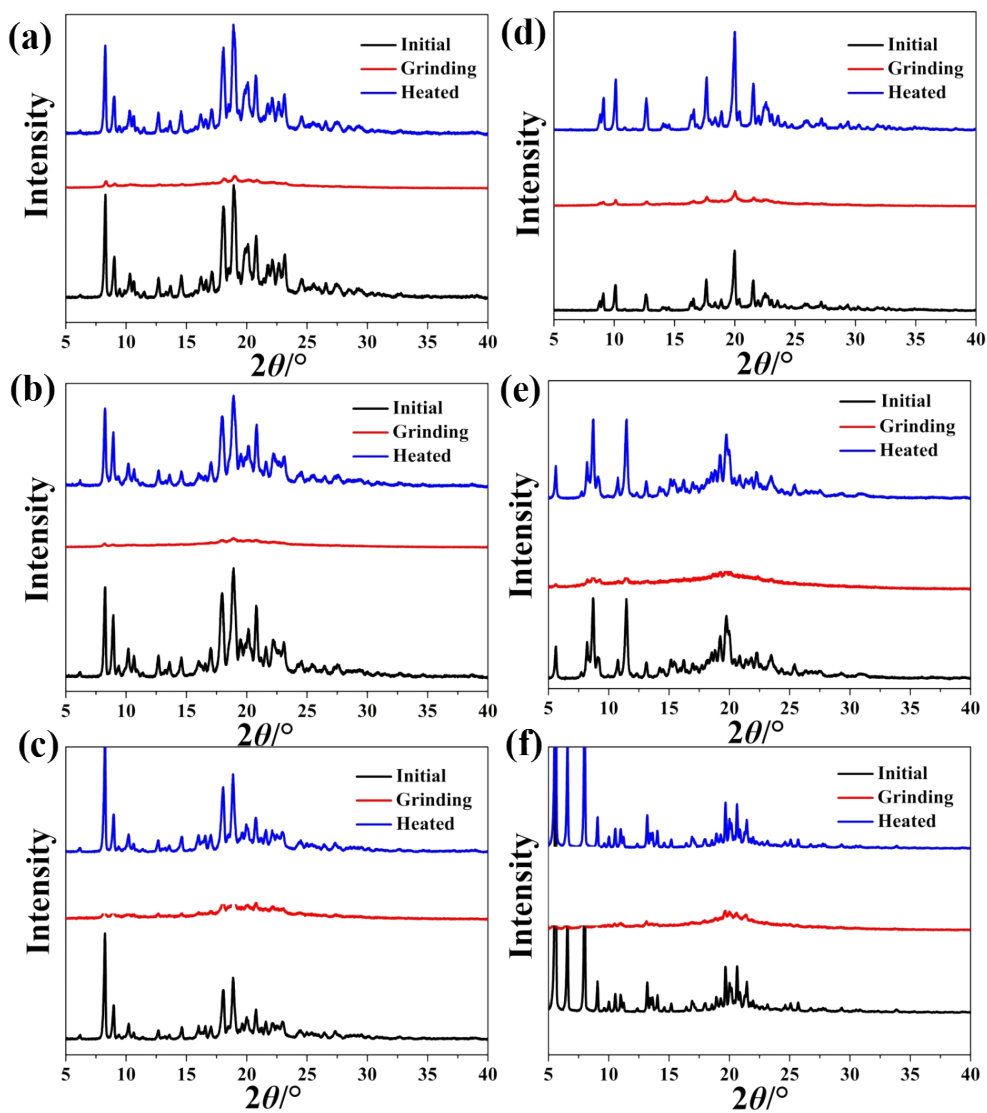

**Fig. S26** PXR D patterns of pristine, ground and fumed with EtOH samples of **G4 (a), G3 (b), G2 (c), L-G4 (d), L-G3 (e), L-G2 (f).**

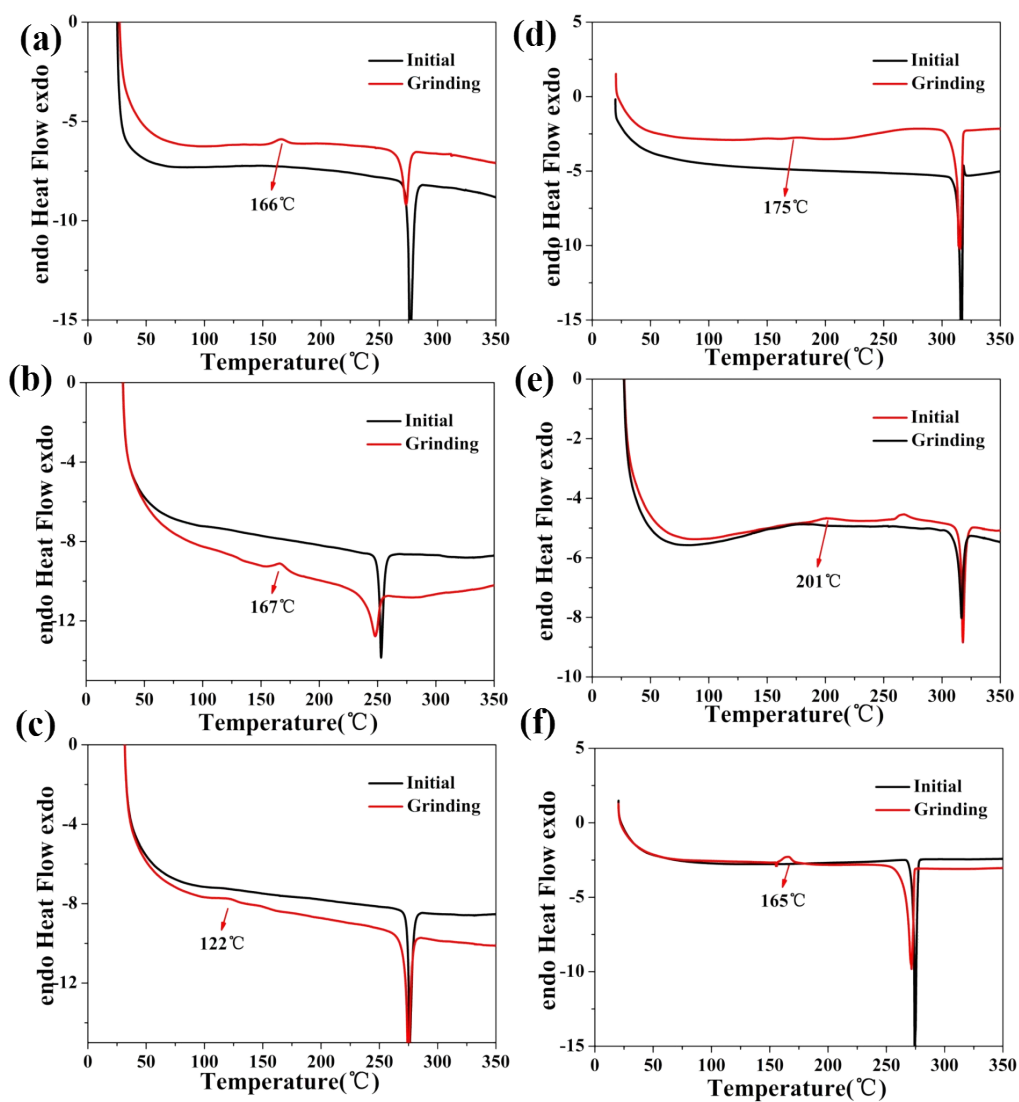

**Fig. S27** DSC curve of G4 (a), G3 (b), G2 (c), L-G4 (d), L-G3 (e), L-G2 (f) in the pristine and ground powders. (Scan rate: 10 °C/min)



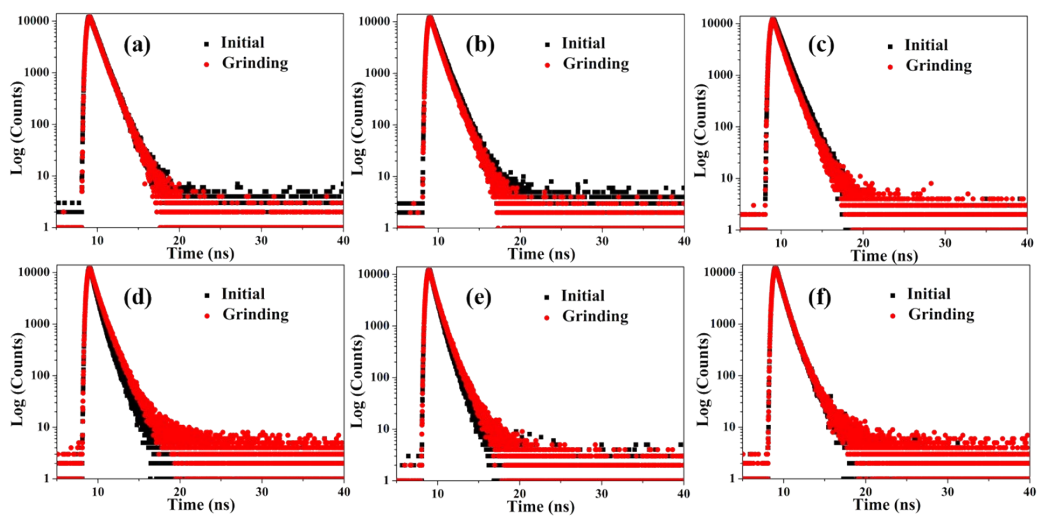

**Fig. S28** The fluorescence lifetimes of **G2** (a), **G3** (b), **G4** (c), **L-G2** (d), **L-G3** (e), **L-G4** (f) in the pristine and ground powders.

**Table S3** Summary of crystallographic data and structure refinement details for  
**G3** and **L-G3**

| Compounds                               | L-G3                                                                | G3                                                                |
|-----------------------------------------|---------------------------------------------------------------------|-------------------------------------------------------------------|
| Formula                                 | C <sub>55</sub> H <sub>36</sub> N <sub>4</sub>                      | C <sub>55</sub> H <sub>38</sub> N <sub>4</sub>                    |
| Mr                                      | 752.29                                                              | 754.89                                                            |
| Temperature                             | 293                                                                 | 293                                                               |
| Crystal system                          | Triclinic                                                           | Monoclinic                                                        |
| Space group                             | <i>P</i> -1                                                         | <i>P</i> 2 <sub>1</sub> / <i>c</i>                                |
| <i>a</i> (Å)                            | 12.057                                                              | 42.8295                                                           |
| <i>b</i> (Å)                            | 12.616                                                              | 9.8166                                                            |
| <i>c</i> (Å)                            | 16.803                                                              | 19.5245                                                           |
| Volume                                  | 2160.5                                                              | 8171.0                                                            |
| Z, Calculated density                   | 2, 1.288 (g/cm <sup>-3</sup> )                                      | 8, 1.227 (g/cm <sup>-3</sup> )                                    |
| F(000)                                  | 872.0                                                               | 3168.0                                                            |
| <i>Data/restraints/parameters</i>       | 7631/0/559                                                          | 13930/134/1098                                                    |
| <i>Goodness-of-fit on F<sup>2</sup></i> | 1.061                                                               | 0.950                                                             |
| <i>Largest diff.peak and hole</i>       | 0.88 and -0.49<br>e.Å <sup>-3</sup>                                 | 0.33 and -0.51 e.Å <sup>-3</sup>                                  |
|                                         | -14 ≤ <i>h</i> ≤ 11                                                 | -50 ≤ <i>h</i> ≤ 31                                               |
| Limiting indices                        | -14 ≤ <i>k</i> ≤ 14                                                 | -7 ≤ <i>k</i> ≤ 11                                                |
|                                         | -20 ≤ <i>l</i> ≤ 15                                                 | -20 ≤ <i>l</i> ≤ 23                                               |
| Reflection collected / unique           | 7631 [R <sub>int</sub> =<br>0.0193, R <sub>sigma</sub> =<br>0.0190] | 13930 [R <sub>int</sub> =<br>0.0751, R <sub>sigma</sub> = 0.1045] |
| Final R indices [I>2σ(I)]               | R <sub>1</sub> = 0.0483, wR <sub>2</sub><br>= 0.1408                | R <sub>1</sub> = 0.0705, wR <sub>2</sub> =<br>0.1772              |
| R indices (all)                         | R <sub>1</sub> = 0.0509, wR <sub>2</sub><br>= 0.1451                | R <sub>1</sub> = 0.1652, wR <sub>2</sub> =<br>0.2333              |

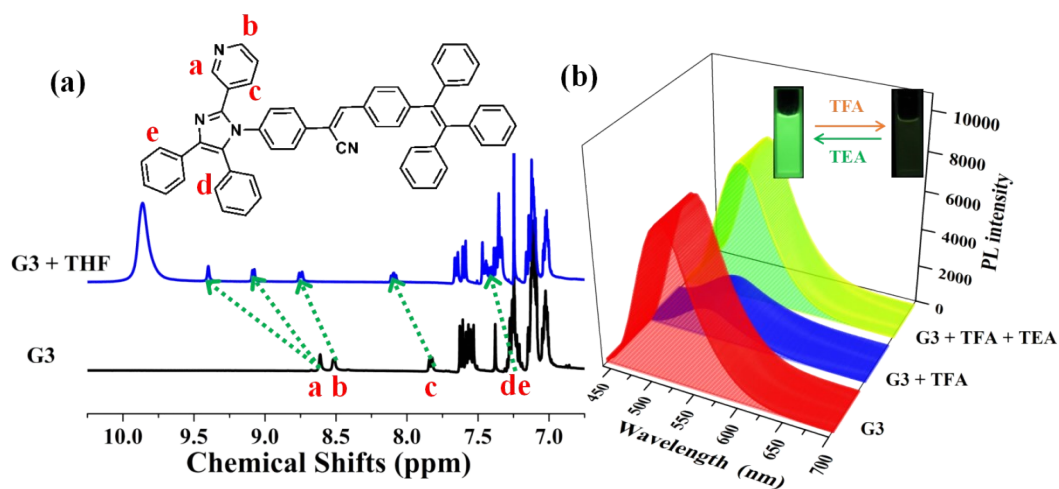

**Fig. S29** (a)  $^1\text{H}$  NMR spectra of G3 in  $\text{CDCl}_3$  in the absence and presence of 2 equivalents TFA; (b) change in the PL spectra of G3 between off and on by reversibly treated with TFA-TEA.

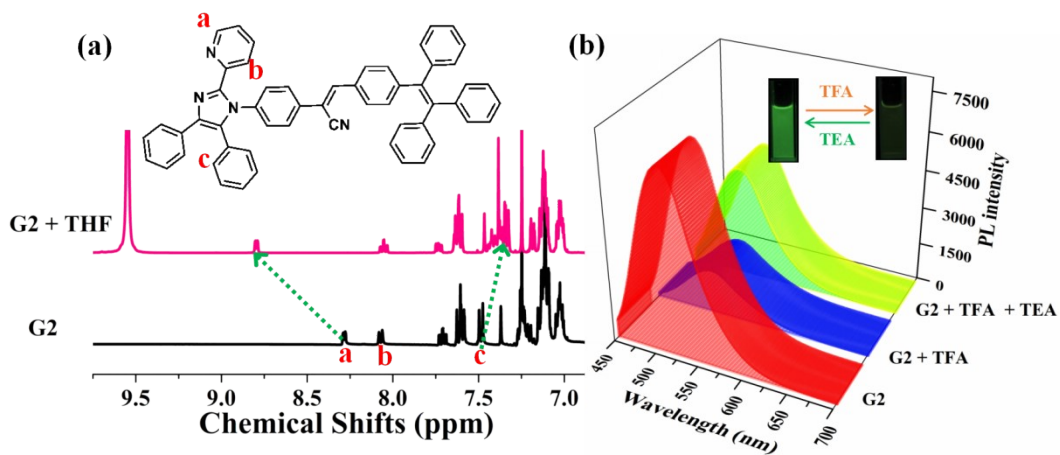

**Fig. S30** (a)  $^1\text{H}$  NMR spectra of G2 in  $\text{CDCl}_3$  in the absence and presence of 2 equivalents TFA; (b) change in the PL spectra of G2 between off and on by reversibly treated with TFA-TEA.

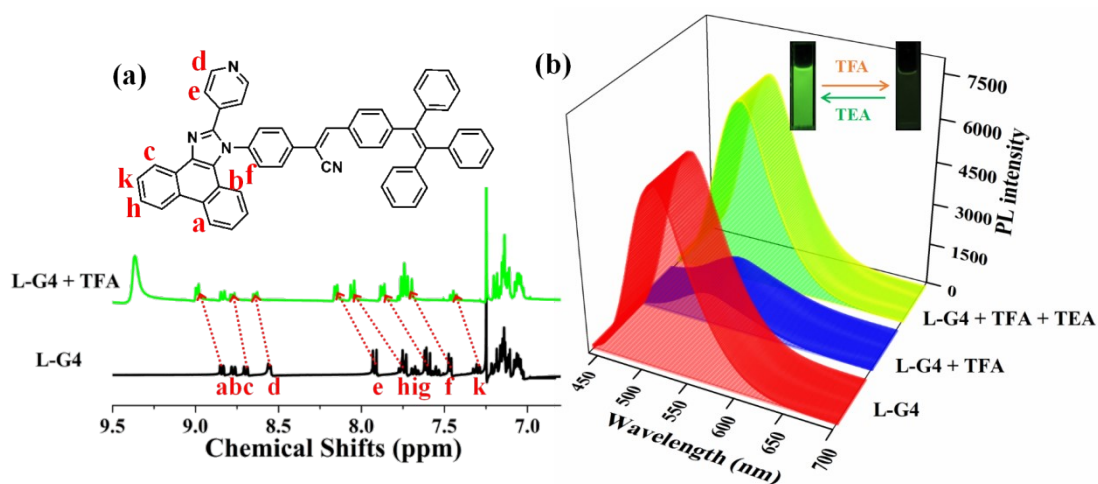

**Fig. S31**  $^1\text{H}$  NMR spectra of L-G4 in  $\text{CDCl}_3$  in the absence and presence of 2 equivalents TFA; (b) change in the PL spectra of L-G4 between off and on by reversibly treated with TFA-TEA.

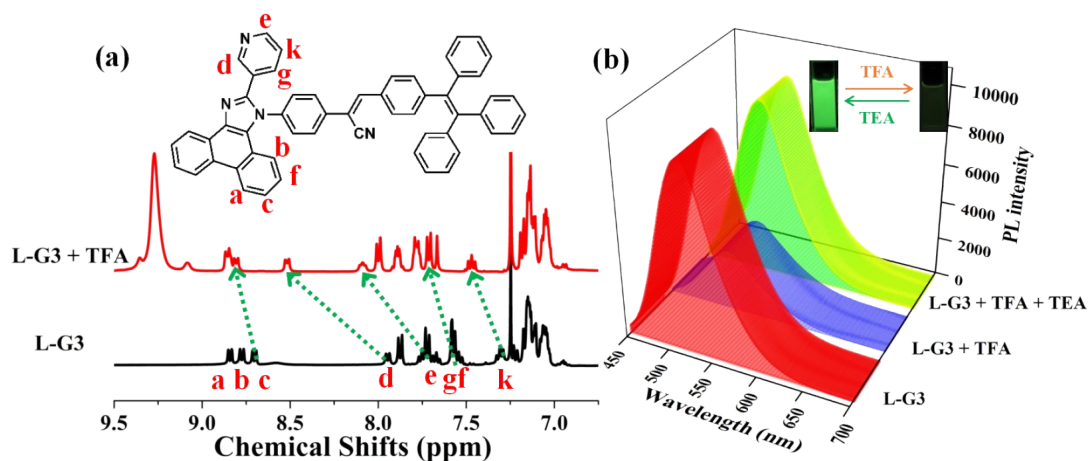

**Fig. S32** (a)  $^1\text{H}$  NMR spectra of L-G3 in  $\text{CDCl}_3$  in the absence and presence of 2 equivalents TFA; (b) change in the PL spectra of L-G3 between off and on by reversibly treated with TFA-TEA.

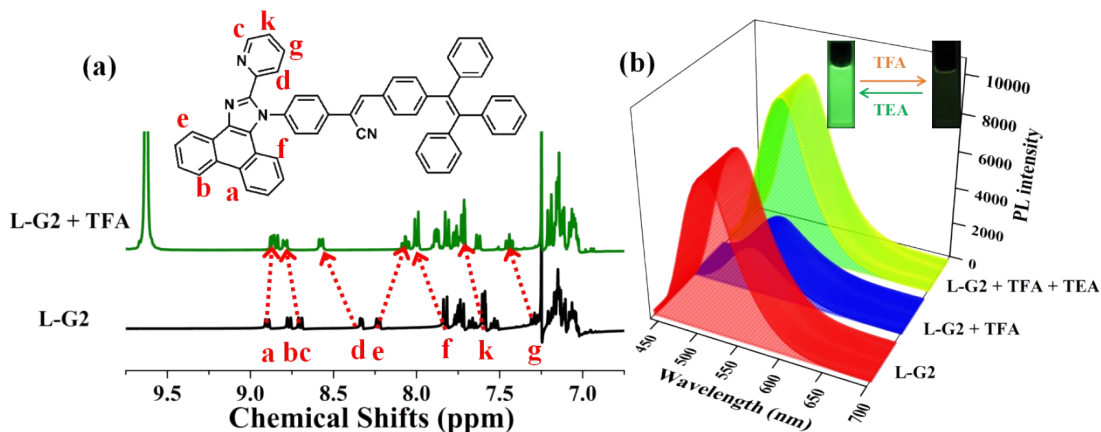

**Fig. S33** (a)  $^1\text{H}$  NMR spectra of L-G2 in  $\text{CDCl}_3$  in the absence and presence of 2 equivalents TFA; (b) change in the PL spectra of L-G2 between off and on by reversibly treated with TFA-TEA.

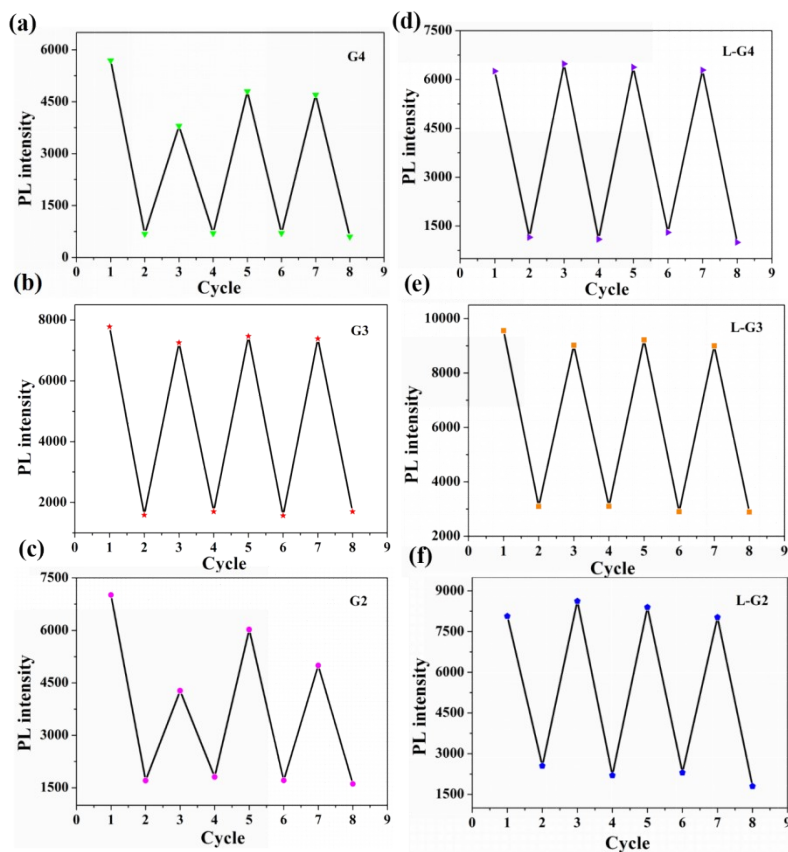

**Fig. S34** Change in the emission intensity of G4 (a), G3 (b), G2 (c), L-G4 (d), L-G3 (e), L-G2 (f) in THF/water ( $v/v = 1:9$ ) by repeated with TFA and TEA.

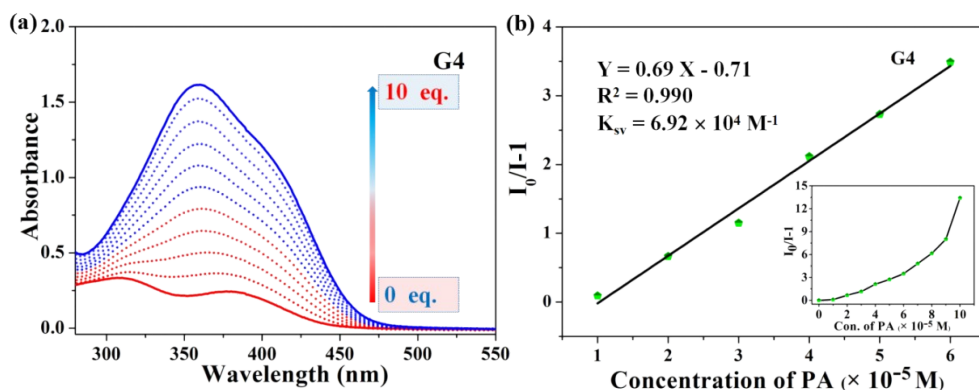

**Fig. S35** (a) UV-vis spectra of **G4** upon additions of PA in THF/H<sub>2</sub>O (v/v = 1:9) mixture. (b) Corresponding Stern-Volmer plot for lower concentration of PA detection.

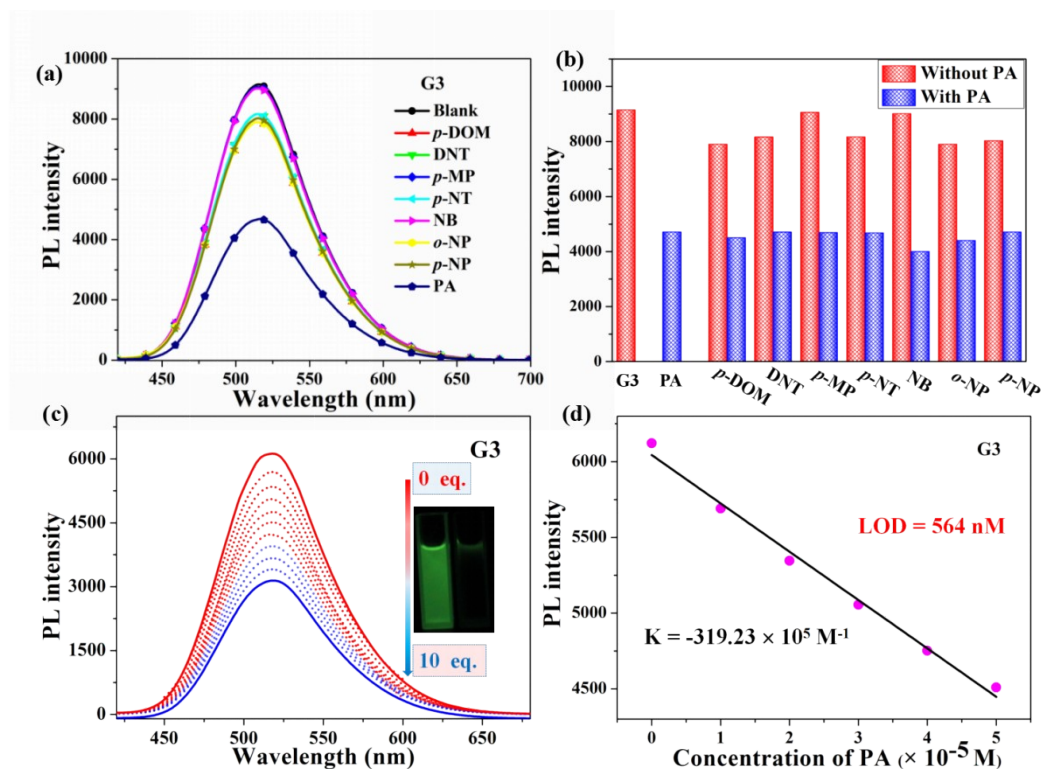

**Fig. S36** (a) PL spectra response of **G3** towards different analytes (10 equiv.) in THF/water (v/v = 1 : 9) medium; (b) quenching percentages of compound **G3** (10.0 mM) with different analytes before (red) and (blue) after the addition of 10 equiv. (c) PL spectra of **G3** upon additions of PA in THF/H<sub>2</sub>O (v/v = 1:9) mixture, Inset: photos of **G3** under UV lamp; (d) The linear relationship of **G3** between the fluorescence intensity and the PA concentration.

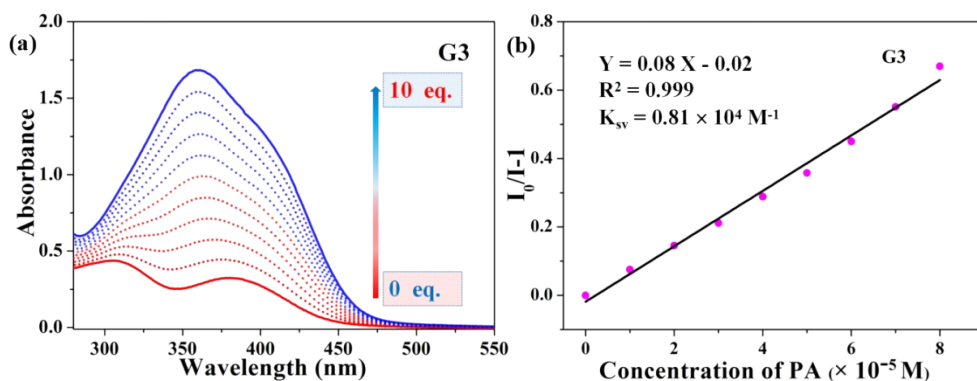

**Fig. S37** (a) UV-vis spectra of **G3** upon additions of PA in THF/H<sub>2</sub>O (v/v = 1:9) mixture. (b) Corresponding Stern-Volmer plot for lower concentration of PA detection.

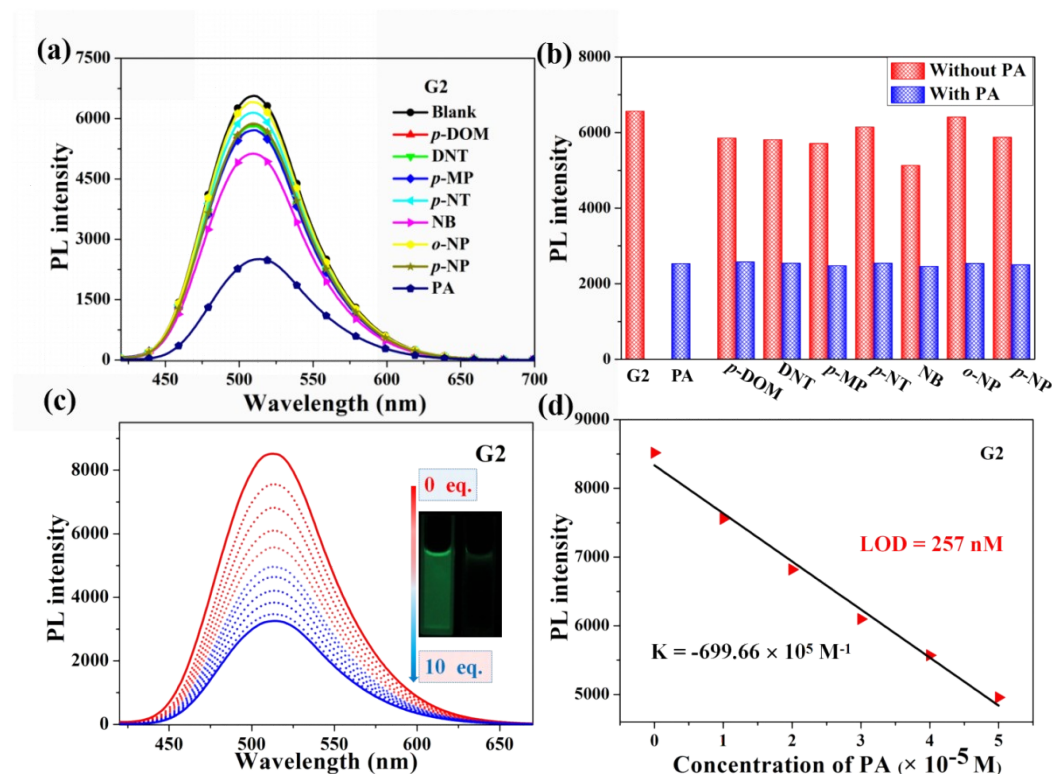

**Fig. S38** (a) PL spectra response of **G2** towards different analytes (10 equiv.) in THF/water (v/v = 1 : 9) medium; (b) quenching percentages of compound **G2** (10.0 mM) with different analytes before (red) and (blue) after the addition of 10 equiv. (c) PL spectra of **G4** upon additions of PA in THF/H<sub>2</sub>O (v/v = 1:9) mixture, Inset: photos of **G2** under UV lamp; (b) The linear relationship of **G2** between the fluorescence intensity and the PA concentration.

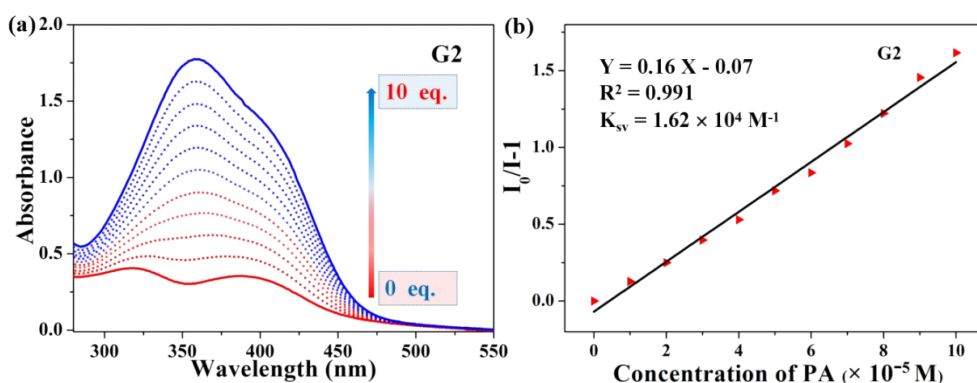

**Fig. S39** (a) UV-vis spectra of G2 upon additions of PA in THF/H<sub>2</sub>O (v/v = 1:9) mixture. (b) Corresponding Stern-Volmer plot for lower concentration of PA detection.

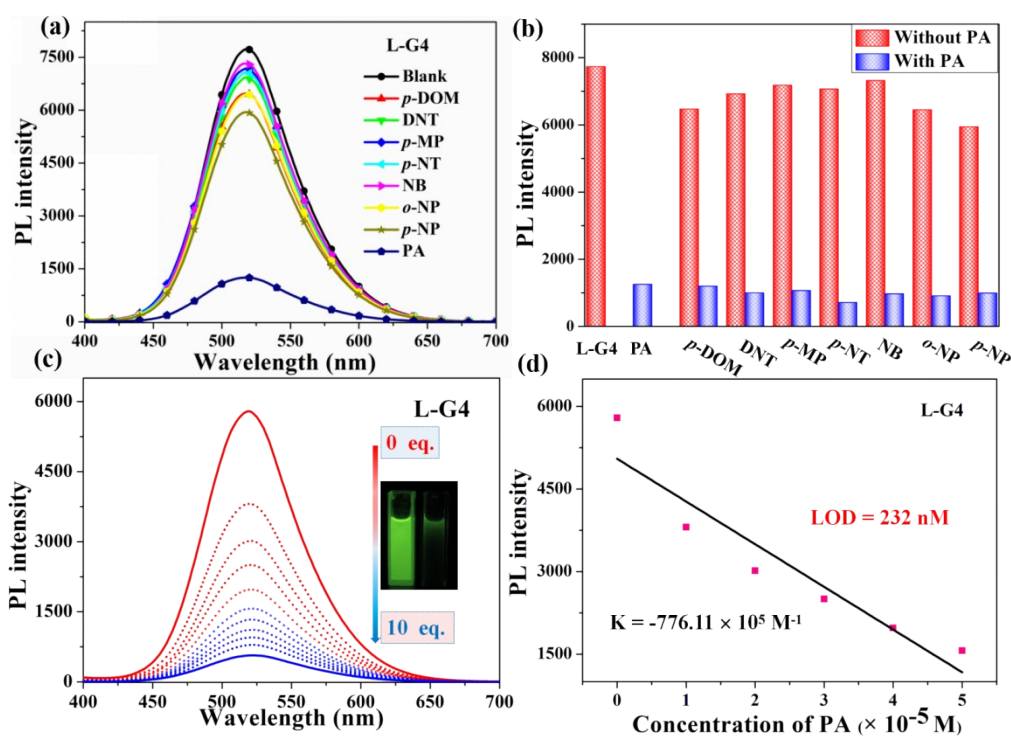

**Fig. S40** (a) PL spectra response of L-G4 towards different analytes (10 equiv.) in THF/water (v/v = 1 : 9) medium; (b) quenching percentages of compound L-G4 (10.0 mM) with different analytes before (red) and (blue) after the addition of 10 equiv. (c) PL spectra of L-G4 upon additions of PA in THF/H<sub>2</sub>O (v/v = 1:9) mixture, Inset: photos of L-G4 under UV lamp; (d) The linear relationship of L-G4 between the fluorescence intensity and the PA concentration.



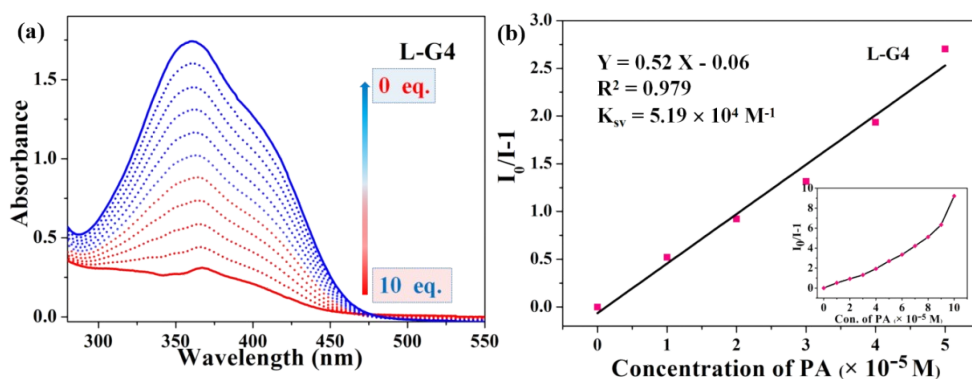

**Fig. S41** (a) UV-vis spectra of L-G4 upon additions of PA in THF/H<sub>2</sub>O (v/v = 1:9) mixture. (b) Corresponding Stern-Volmer plot for lower concentration of PA detection.

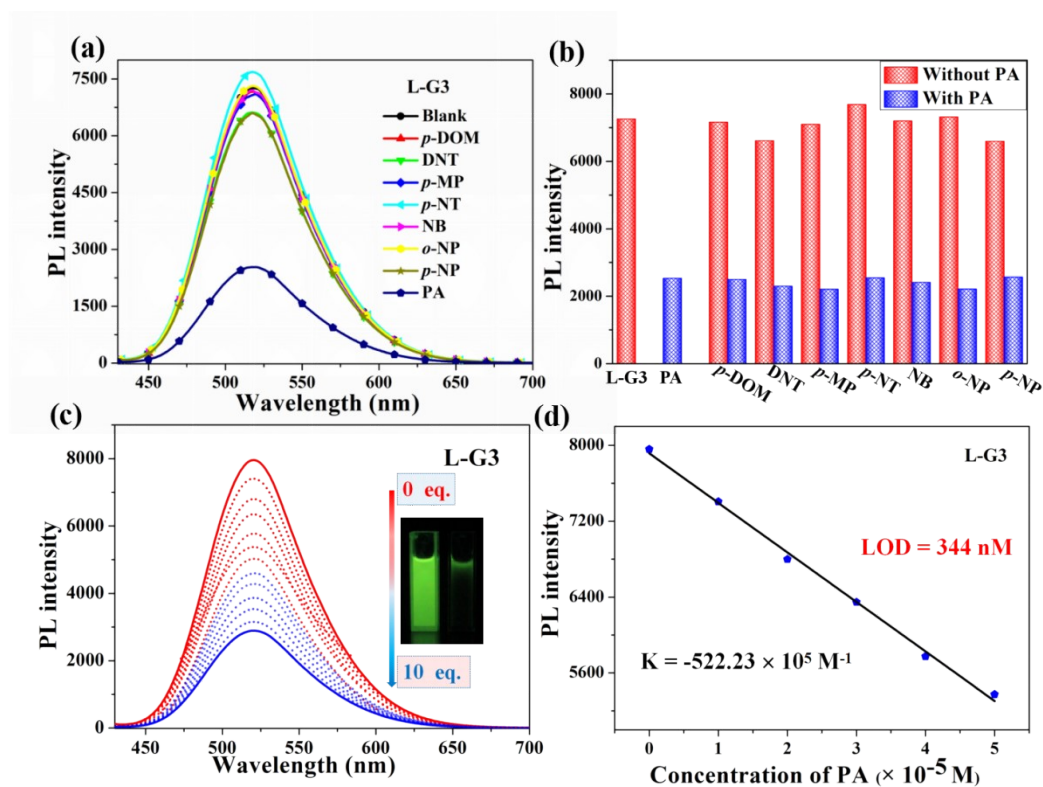

**Fig. S42** (a) PL spectra response of L-G3 towards different analytes (10 equiv.) in THF/water (v/v = 1 : 9) medium; (b) quenching percentages of compound L-G3 (10.0 mM) with different analytes before (red) and (blue) after the addition of 10 equiv. (c) PL spectra of L-G3 upon additions of PA in THF/H<sub>2</sub>O (v/v = 1:9) mixture, Inset: photos of L-G3 under UV lamp; (d) The linear relationship of L-G3 between the fluorescence intensity and the PA concentration.

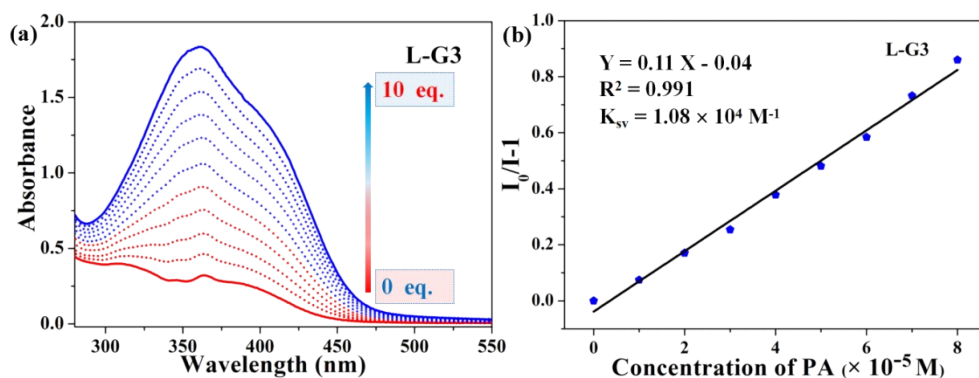

**Fig. S43** (a) UV-vis spectra of L-G3 upon additions of PA in THF/H<sub>2</sub>O (v/v = 1:9) mixture. (b) Corresponding Stern-Volmer plot for lower concentration of PA detection.

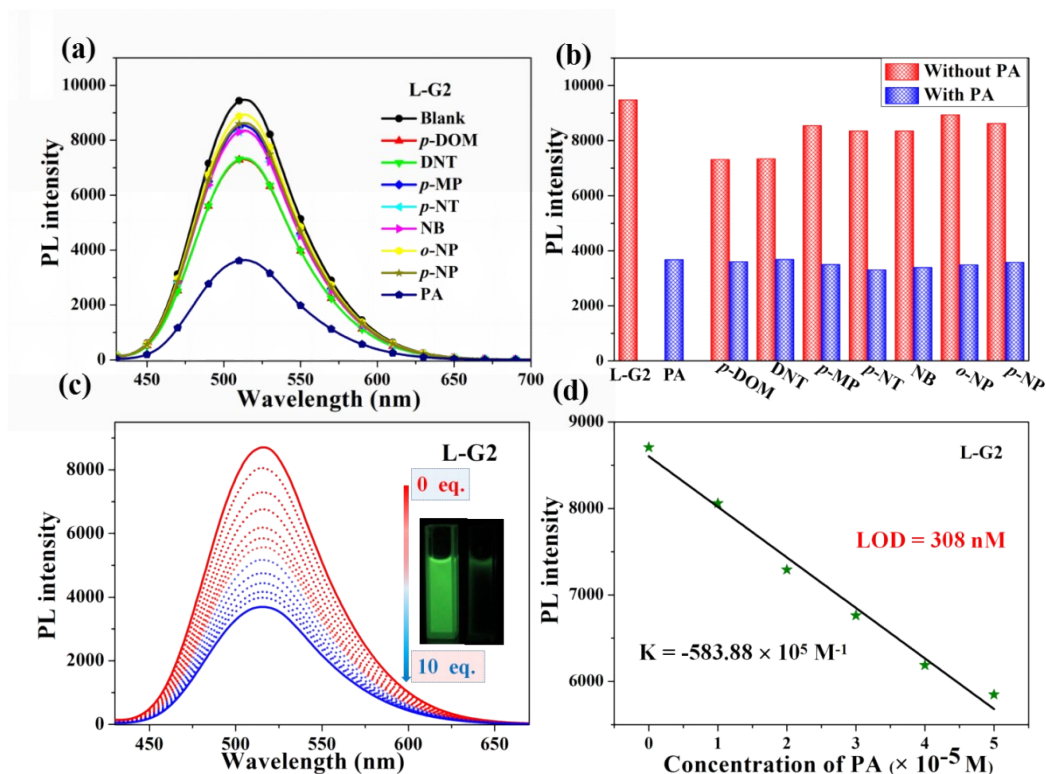

**Fig. S44** (a) PL spectra response of L-G2 towards different analytes (10 equiv.) in THF/water (v/v = 1 : 9) medium; (b) quenching percentages of compound L-G2 (10.0 mM) with different analytes before (red) and (blue) after the addition of 10 equiv. (c) PL spectra of L-G2 upon additions of PA in THF/H<sub>2</sub>O (v/v = 1:9) mixture, Inset: photos of L-G2 under UV lamp; (d) The linear relationship of L-G2 between the fluorescence intensity and the PA concentration.

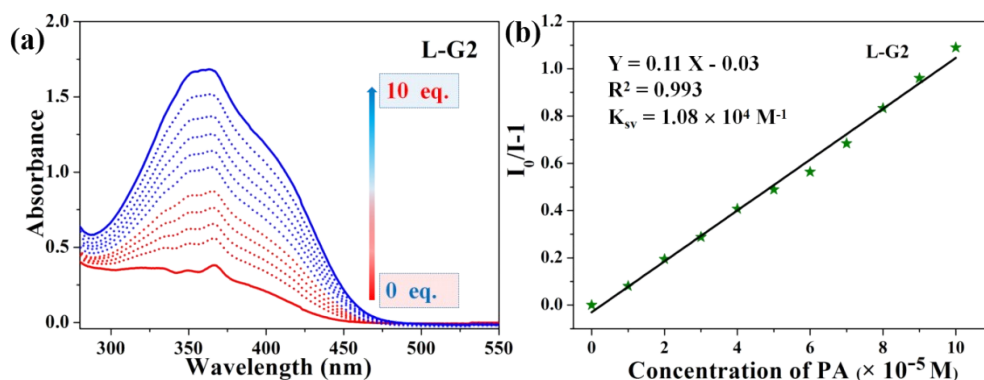

**Fig. S45** (a) UV-vis spectra of **L-G2** upon additions of PA in THF/H<sub>2</sub>O (v/v = 1:9) mixture. (b) Corresponding Stern-Volmer plot for lower concentration of PA detection.

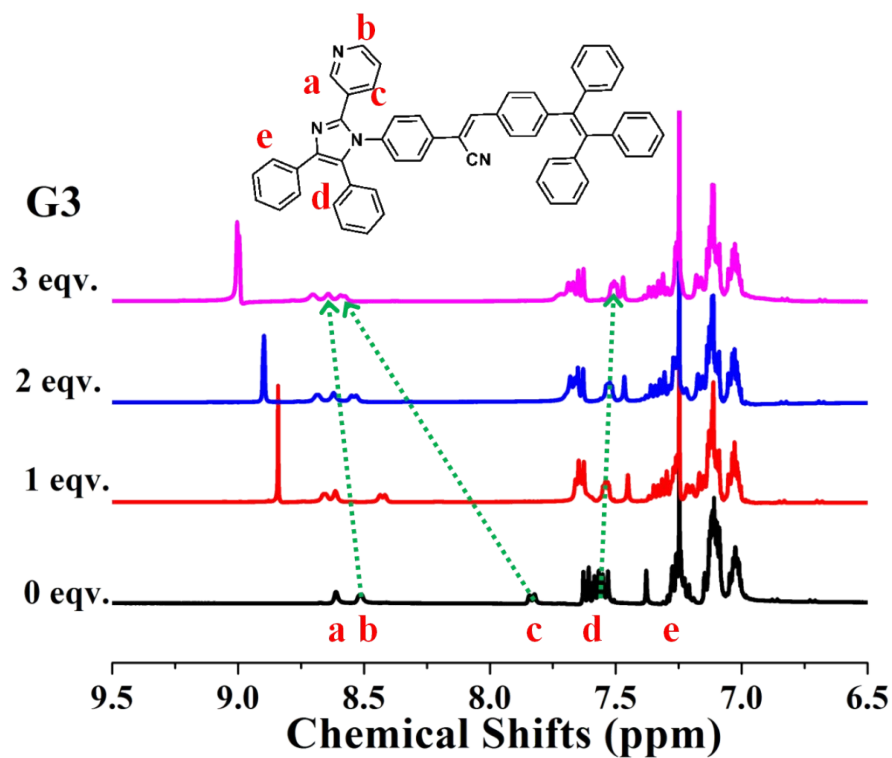

**Fig. S46** Partial <sup>1</sup>H NMR titration spectra of **G3** upon addition of PA (0, 1, 2, 3 equiv.) in CDCl<sub>3</sub>.

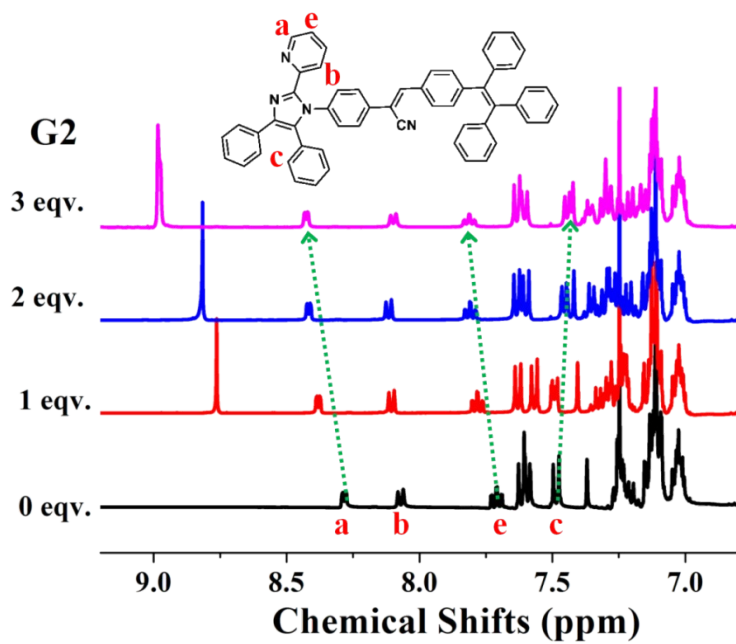

**Fig. S47** Partial  $^1\text{H}$  NMR titration spectra of **G2** upon addition of PA (0, 1, 2, 3 equiv.) in  $\text{CDCl}_3$ .

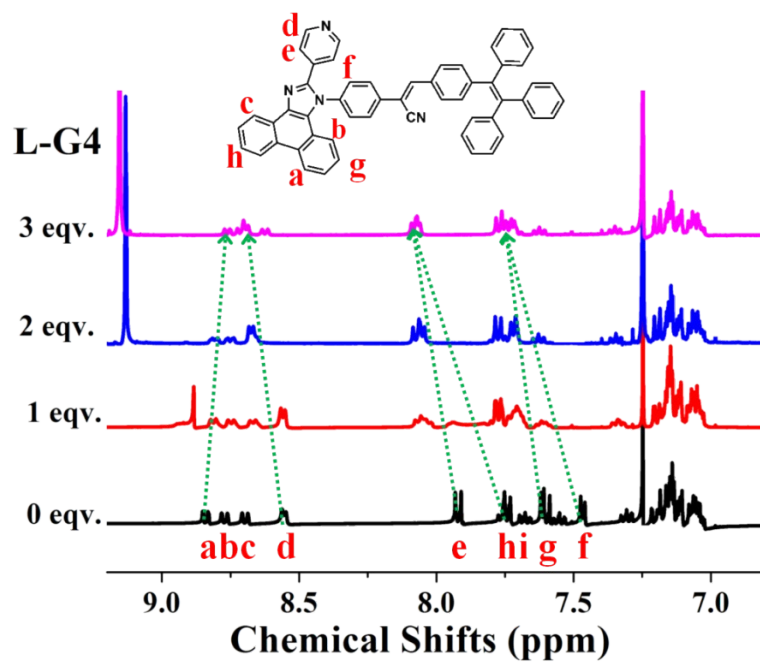

**Fig. S48** Partial  $^1\text{H}$  NMR titration spectra of **L-G4** upon addition of PA (0, 1, 2, 3 equiv.) in  $\text{CDCl}_3$ .

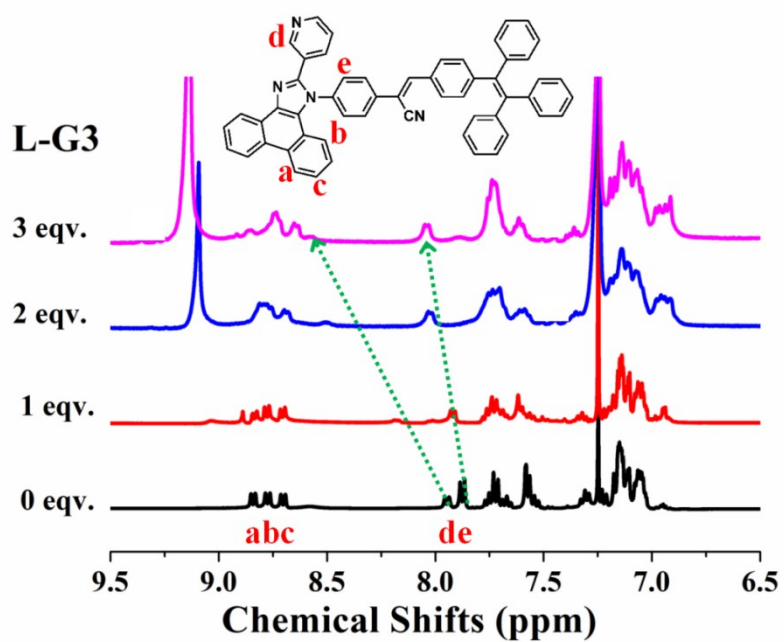

**Fig. S49** Partial  $^1\text{H}$  NMR titration spectra of **L-G3** upon addition of PA (0, 1, 2, 3 equiv.) in  $\text{CDCl}_3$ .

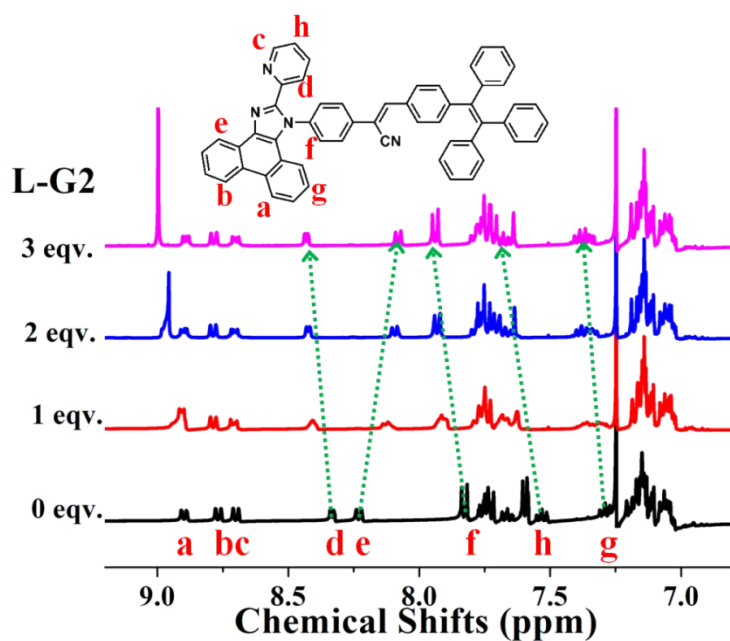

**Fig. S50** Partial  $^1\text{H}$  NMR titration spectra of **L-G2** upon addition of PA (0, 1, 2, 3 equiv.) in  $\text{CDCl}_3$ .

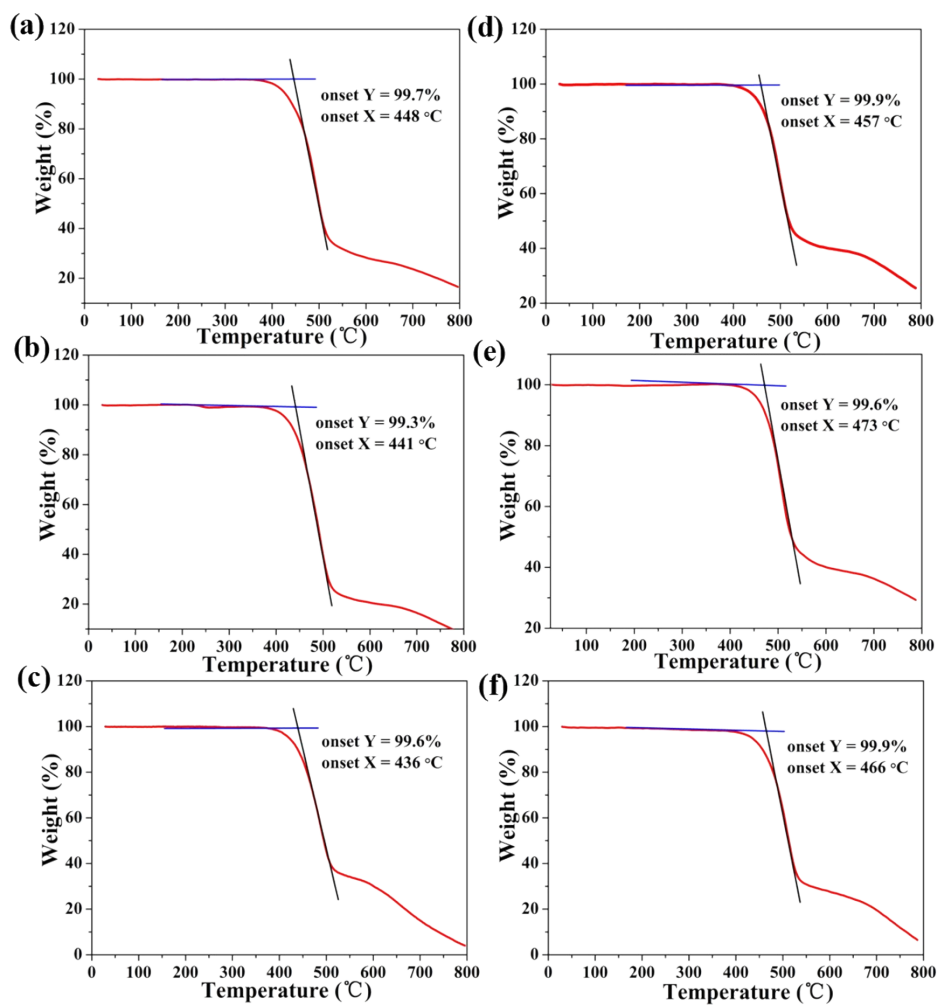

**Fig. S51** TGA curve of **G4** (a), **G3** (b), **G2** (c), **L-G4** (d), **L-G3** (e), **L-G2** (f) in powders. (Scan rate: 10 °C/min)
